# Supplementary material for: Conserved Biological Processes in Partial Cellular Reprogramming: A Comprehensive Review
Source: Preprints.org preprint supplement (doi:10.20944/preprints202410.0122.v1), 2024-10-02
Supplement: Supplementary file 1 [file supplementary]

## Sheet: legend
column	description
source	study the observation is from
treatment	whether the in vivo treatment was whole-body or tissue-specific
tissue measured	the tissue that is being measured
cell type	when specified, the cell type that is being measured
cell subtype	when specified, the tissue subtype that is being measured
class	whether the observation occurs between reprogrammed and control mice, or young and old mice
process	the process that is measured to change in the study
process class	broad classification of what the process is involved in. not all processes are classified
direction	the direction of change observed in the process in reprogrammed or aged samples. 'no change' indicates there were no significant observed changes
experiment	whether the experiment is in vitro or in vivo
species	the species the experiment was performed on
disease	whether the data is from a diseased or wildtype genetic background
sequencing	sequencing that was performed to measure the change in process
GSE	when available, the source to download the data
group_1	whether the reference group has been treated with any chemicals, molecules, or reprogramming factors
group_2	whether the treatment group has been treated with any chemicals, molecules, or reprogramming factors
age_1	when available, age of the reference group
age_2	when available, age of the treatment group
treatment_1	when available, details for reference treatment
treatment_2	when available, details for treatment group treatment
recovery	when available, the amount of time the sample was allowed to recover prior to sequencing
chemical_details	when available, details of the chemical treatments used
source	location in the original text where the results are shown
PMID	PMID id of original paper
treatment_type	when available, whether the cells were treated with OSKM or chemically

## Sheet: data
source	treatment	tissue measured	cell type	cell subtype	class	process	process class	direction	experiment	species	disease	sequencing	GSE	group_1	group_2	age_1	age_2	treatment_1	treatment_2	recovery	chemical_details	source	PMID	treatment_type
Browder et al	whole body	kidney	NA	NA	reprogramming	blood clock	Aging	no change	in vivo	mouse	WT	methylation array	GSE190665	untreated	treated	22m	22m	NA	[OSKM[2d]+rest[5d]]*[7m]	5d	NA	figure 2a	37118377	OSKM
Browder et al	whole body	kidney	NA	NA	reprogramming	kidney clock	Aging	down	in vivo	mouse	WT	methylation array	GSE190665	untreated	treated	22m	22m	NA	[OSKM[2d]+rest[5d]]*[7m]	5d	NA	figure 2a	37118377	OSKM
Browder et al	whole body	kidney	NA	NA	reprogramming	pan-tissue clock	Aging	no change	in vivo	mouse	WT	methylation array	GSE190665	untreated	treated	22m	22m	NA	[OSKM[2d]+rest[5d]]*[7m]	5d	NA	figure 2a	37118377	OSKM
Browder et al	whole body	kidney	NA	NA	reprogramming	blood clock	Aging	down	in vivo	mouse	WT	methylation array	GSE190665	untreated	treated	22m	22m	NA	[OSKM[2d]+rest[5d]]*[1m]	5d	NA	figure 2b	37118377	OSKM
Browder et al	whole body	kidney	NA	NA	reprogramming	kidney clock	Aging	no change	in vivo	mouse	WT	methylation array	GSE190665	untreated	treated	22m	22m	NA	[OSKM[2d]+rest[5d]]*[1m]	5d	NA	figure 2b	37118377	OSKM
Browder et al	whole body	kidney	NA	NA	reprogramming	pan-tissue clock	Aging	no change	in vivo	mouse	WT	methylation array	GSE190665	untreated	treated	22m	22m	NA	[OSKM[2d]+rest[5d]]*[1m]	5d	NA	figure 2b	37118377	OSKM
Browder et al	whole body	liver	NA	NA	reprogramming	blood clock	Aging	no change	in vivo	mouse	WT	methylation array	GSE190665	untreated	treated	22m	22m	NA	[OSKM[2d]+rest[5d]]*[7m]	5d	NA	figure 2a	37118377	OSKM
Browder et al	whole body	liver	NA	NA	reprogramming	liver clock	Aging	no change	in vivo	mouse	WT	methylation array	GSE190665	untreated	treated	22m	22m	NA	[OSKM[2d]+rest[5d]]*[7m]	5d	NA	figure 2a	37118377	OSKM
Browder et al	whole body	liver	NA	NA	reprogramming	pan-tissue clock	Aging	no change	in vivo	mouse	WT	methylation array	GSE190665	untreated	treated	22m	22m	NA	[OSKM[2d]+rest[5d]]*[7m]	5d	NA	figure 2a	37118377	OSKM
Browder et al	whole body	liver	NA	NA	reprogramming	blood clock	Aging	no change	in vivo	mouse	WT	methylation array	GSE190665	untreated	treated	22m	22m	NA	[OSKM[2d]+rest[5d]]*[1m]	5d	NA	figure 2b	37118377	OSKM
Browder et al	whole body	liver	NA	NA	reprogramming	liver clock	Aging	no change	in vivo	mouse	WT	methylation array	GSE190665	untreated	treated	22m	22m	NA	[OSKM[2d]+rest[5d]]*[1m]	5d	NA	figure 2b	37118377	OSKM
Browder et al	whole body	liver	NA	NA	reprogramming	pan-tissue clock	Aging	no change	in vivo	mouse	WT	methylation array	GSE190665	untreated	treated	22m	22m	NA	[OSKM[2d]+rest[5d]]*[1m]	5d	NA	figure 2b	37118377	OSKM
Browder et al	whole body	lung	NA	NA	reprogramming	blood clock	Aging	no change	in vivo	mouse	WT	methylation array	GSE190665	untreated	treated	22m	22m	NA	[OSKM[2d]+rest[5d]]*[7m]	5d	NA	figure 2a	37118377	OSKM
Browder et al	whole body	lung	NA	NA	reprogramming	fibroblast clock	Aging	no change	in vivo	mouse	WT	methylation array	GSE190665	untreated	treated	22m	22m	NA	[OSKM[2d]+rest[5d]]*[7m]	5d	NA	figure 2a	37118377	OSKM
Browder et al	whole body	lung	NA	NA	reprogramming	pan-tissue clock	Aging	no change	in vivo	mouse	WT	methylation array	GSE190665	untreated	treated	22m	22m	NA	[OSKM[2d]+rest[5d]]*[7m]	5d	NA	figure 2a	37118377	OSKM
Browder et al	whole body	lung	NA	NA	reprogramming	blood clock	Aging	no change	in vivo	mouse	WT	methylation array	GSE190665	untreated	treated	22m	22m	NA	[OSKM[2d]+rest[5d]]*[1m]	5d	NA	figure 2b	37118377	OSKM
Browder et al	whole body	lung	NA	NA	reprogramming	fibroblast clock	Aging	no change	in vivo	mouse	WT	methylation array	GSE190665	untreated	treated	22m	22m	NA	[OSKM[2d]+rest[5d]]*[1m]	5d	NA	figure 2b	37118377	OSKM
Browder et al	whole body	lung	NA	NA	reprogramming	pan-tissue clock	Aging	no change	in vivo	mouse	WT	methylation array	GSE190665	untreated	treated	22m	22m	NA	[OSKM[2d]+rest[5d]]*[1m]	5d	NA	figure 2b	37118377	OSKM
Browder et al	whole body	muscle	NA	NA	reprogramming	blood clock	Aging	no change	in vivo	mouse	WT	methylation array	GSE190665	untreated	treated	22m	22m	NA	[OSKM[2d]+rest[5d]]*[7m]	5d	NA	figure 2a	37118377	OSKM
Browder et al	whole body	muscle	NA	NA	reprogramming	muscle clock	Aging	no change	in vivo	mouse	WT	methylation array	GSE190665	untreated	treated	22m	22m	NA	[OSKM[2d]+rest[5d]]*[7m]	5d	NA	figure 2a	37118377	OSKM
Browder et al	whole body	muscle	NA	NA	reprogramming	pan-tissue clock	Aging	no change	in vivo	mouse	WT	methylation array	GSE190665	untreated	treated	22m	22m	NA	[OSKM[2d]+rest[5d]]*[7m]	5d	NA	figure 2a	37118377	OSKM
Browder et al	whole body	muscle	NA	NA	reprogramming	blood clock	Aging	no change	in vivo	mouse	WT	methylation array	GSE190665	untreated	treated	22m	22m	NA	[OSKM[2d]+rest[5d]]*[1m]	5d	NA	figure 2b	37118377	OSKM
Browder et al	whole body	muscle	NA	NA	reprogramming	muscle clock	Aging	no change	in vivo	mouse	WT	methylation array	GSE190665	untreated	treated	22m	22m	NA	[OSKM[2d]+rest[5d]]*[1m]	5d	NA	figure 2b	37118377	OSKM
Browder et al	whole body	muscle	NA	NA	reprogramming	pan-tissue clock	Aging	no change	in vivo	mouse	WT	methylation array	GSE190665	untreated	treated	22m	22m	NA	[OSKM[2d]+rest[5d]]*[1m]	5d	NA	figure 2b	37118377	OSKM
Browder et al	whole body	skin	NA	NA	reprogramming	fibroblast clock	Aging	down	in vivo	mouse	WT	methylation array	GSE190665	untreated	treated	22m	22m	NA	[OSKM[2d]+rest[5d]]*[7m]	5d	NA	figure 2a	37118377	OSKM
Browder et al	whole body	skin	NA	NA	reprogramming	tail clock	Aging	down	in vivo	mouse	WT	methylation array	GSE190665	untreated	treated	22m	22m	NA	[OSKM[2d]+rest[5d]]*[7m]	5d	NA	figure 2a	37118377	OSKM
Browder et al	whole body	skin	NA	NA	reprogramming	pan-tissue clock	Aging	down	in vivo	mouse	WT	methylation array	GSE190665	untreated	treated	22m	22m	NA	[OSKM[2d]+rest[5d]]*[7m]	5d	NA	figure 2a	37118377	OSKM
Browder et al	whole body	skin	NA	NA	reprogramming	fibroblast clock	Aging	no change	in vivo	mouse	WT	methylation array	GSE190665	untreated	treated	22m	22m	NA	[OSKM[2d]+rest[5d]]*[1m]	5d	NA	figure 2b	37118377	OSKM
Browder et al	whole body	skin	NA	NA	reprogramming	tail clock	Aging	no change	in vivo	mouse	WT	methylation array	GSE190665	untreated	treated	22m	22m	NA	[OSKM[2d]+rest[5d]]*[1m]	5d	NA	figure 2b	37118377	OSKM
Browder et al	whole body	skin	NA	NA	reprogramming	pan-tissue clock	Aging	down	in vivo	mouse	WT	methylation array	GSE190665	untreated	treated	22m	22m	NA	[OSKM[2d]+rest[5d]]*[1m]	5d	NA	figure 2b	37118377	OSKM
Browder et al	whole body	spleen	NA	NA	reprogramming	blood clock	Aging	no change	in vivo	mouse	WT	methylation array	GSE190665	untreated	treated	22m	22m	NA	[OSKM[2d]+rest[5d]]*[7m]	5d	NA	figure 2a	37118377	OSKM
Browder et al	whole body	spleen	NA	NA	reprogramming	liver clock	Aging	down	in vivo	mouse	WT	methylation array	GSE190665	untreated	treated	22m	22m	NA	[OSKM[2d]+rest[5d]]*[7m]	5d	NA	figure 2a	37118377	OSKM
Browder et al	whole body	spleen	NA	NA	reprogramming	pan-tissue clock	Aging	no change	in vivo	mouse	WT	methylation array	GSE190665	untreated	treated	22m	22m	NA	[OSKM[2d]+rest[5d]]*[7m]	5d	NA	figure 2a	37118377	OSKM
Browder et al	whole body	spleen	NA	NA	reprogramming	blood clock	Aging	no change	in vivo	mouse	WT	methylation array	GSE190665	untreated	treated	22m	22m	NA	[OSKM[2d]+rest[5d]]*[1m]	5d	NA	figure 2b	37118377	OSKM
Browder et al	whole body	spleen	NA	NA	reprogramming	liver clock	Aging	no change	in vivo	mouse	WT	methylation array	GSE190665	untreated	treated	22m	22m	NA	[OSKM[2d]+rest[5d]]*[1m]	5d	NA	figure 2b	37118377	OSKM
Browder et al	whole body	spleen	NA	NA	reprogramming	pan-tissue clock	Aging	no change	in vivo	mouse	WT	methylation array	GSE190665	untreated	treated	22m	22m	NA	[OSKM[2d]+rest[5d]]*[1m]	5d	NA	figure 2b	37118377	OSKM
Browder et al	whole body	skin	NA	NA	reprogramming	oxidative phosphorylation	Energetics	up	in vivo	mouse	WT	bulk RNA-seq	GSE190665	untreated	treated	22m	22m	NA	[OSKM[2d]+rest[5d]]*[7m]	5d	NA	text p246	37118377	OSKM
Browder et al	whole body	skin	NA	NA	reprogramming	inflammation	Inflammation	down	in vivo	mouse	WT	bulk RNA-seq	GSE190665	untreated	treated	22m	22m	NA	[OSKM[2d]+rest[5d]]*[7m]	5d	NA	text p246	37118377	OSKM
Browder et al	whole body	skin	NA	NA	reprogramming	senescence	Senescence	down	in vivo	mouse	WT	bulk RNA-seq	GSE190665	untreated	treated	22m	22m	NA	[OSKM[2d]+rest[5d]]*[7m]	5d	NA	figure 4e	37118377	OSKM
Browder et al	whole body	skin	NA	NA	reprogramming	epidermal differentiation	Development/Differentiation	down	in vivo	mouse	WT	bulk RNA-seq	GSE190665	untreated	treated	22m	22m	NA	[OSKM[2d]+rest[5d]]*[7m]	5d	NA	figure 4	37118377	OSKM
Browder et al	whole body	serum	NA	NA	reprogramming	metabolite abundance	Metabolism	down	in vivo	mouse	WT	metabolomics	supplementary	untreated	treated	22m	22m	NA	[OSKM[2d]+rest[5d]]*[10m]	5d	NA	figure 6	37118377	OSKM
Browder et al	whole body	serum	NA	NA	reprogramming	motility/migration		up	in vivo	mouse	WT	bulk RNA-seq	GSE190665	untreated	treated	26m	26m	NA	[OSKM[2d]+rest[5d]]*[1m]	5d	NA	figure 3e	37118377	OSKM
Browder et al	whole body	serum	NA	NA	reprogramming	hair development	Development/Differentiation	up	in vivo	mouse	WT	bulk RNA-seq	GSE190665	untreated	treated	26m	26m	NA	[OSKM[2d]+rest[5d]]*[1m]	5d	NA	figure 3e	37118377	OSKM
Browder et al	whole body	serum	NA	NA	reprogramming	cellular response to cytokines	Inflammation	down	in vivo	mouse	WT	bulk RNA-seq	GSE190665	untreated	treated	26m	26m	NA	[OSKM[2d]+rest[5d]]*[1m]	5d	NA	figure 3e	37118377	OSKM
Browder et al	whole body	skin	NA	NA	reprogramming	inflammation	Inflammation	down	in vivo	mouse	WT	bulk RNA-seq	GSE190665	untreated	treated	22m	22m	NA	[OSKM[2d]+rest[5d]]*[7m]	5d	NA	figure 4e	37118377	OSKM
Browder et al	whole body	skin	NA	NA	reprogramming	lipid and fatty acid metabolism	Energetics	up	in vivo	mouse	WT	bulk RNA-seq	GSE190665	untreated	treated	22m	22m	NA	[OSKM[2d]+rest[5d]]*[7m]	5d	NA	text p247	37118377	OSKM
Browder et al	whole body	skin	NA	NA	reprogramming	lipid and fatty acid metabolism	Energetics	up	in vivo	mouse	WT	bulk RNA-seq	GSE190665	untreated	treated	22m	22m	NA	[OSKM[2d]+rest[5d]]*[10m]	5d	NA	text p247	37118377	OSKM
Browder et al	whole body	skin	NA	NA	reprogramming	epidermal cell differentiation	Development/Differentiation	down	in vivo	mouse	WT	bulk RNA-seq	GSE190665	untreated	treated	22m	22m	NA	[OSKM[2d]+rest[5d]]*[7m]	5d	NA	text p247	37118377	OSKM
Browder et al	whole body	skin	NA	NA	reprogramming	epidermal cell differentiation	Development/Differentiation	down	in vivo	mouse	WT	bulk RNA-seq	GSE190665	untreated	treated	22m	22m	NA	[OSKM[2d]+rest[5d]]*[10m]	5d	NA	text p247	37118377	OSKM
Browder et al	whole body	skin	NA	NA	reprogramming	regulation of fatty acid metabolic process	Energetics	up	in vivo	mouse	WT	bulk RNA-seq	GSE190665	untreated	treated	22m	22m	NA	[OSKM[2d]+rest[5d]]*[7m]	5d	NA	figure 4f	37118377	OSKM
Browder et al	whole body	skin	NA	NA	reprogramming	regulation of fatty acid metabolic process	Energetics	up	in vivo	mouse	WT	bulk RNA-seq	GSE190665	untreated	treated	22m	22m	NA	[OSKM[2d]+rest[5d]]*[10m]	5d	NA	figure 4f	37118377	OSKM
Browder et al	whole body	skin	NA	NA	reprogramming	epidermis development	Development/Differentiation	down	in vivo	mouse	WT	bulk RNA-seq	GSE190665	untreated	treated	22m	22m	NA	[OSKM[2d]+rest[5d]]*[7m]	5d	NA	figure 4f	37118377	OSKM
Browder et al	whole body	skin	NA	NA	reprogramming	epidermis development	Development/Differentiation	down	in vivo	mouse	WT	bulk RNA-seq	GSE190665	untreated	treated	22m	22m	NA	[OSKM[2d]+rest[5d]]*[10m]	5d	NA	figure 4f	37118377	OSKM
Browder et al	whole body	skin	NA	NA	reprogramming	skin development	Development/Differentiation	down	in vivo	mouse	WT	bulk RNA-seq	GSE190665	untreated	treated	22m	22m	NA	[OSKM[2d]+rest[5d]]*[7m]	5d	NA	figure 4f	37118377	OSKM
Browder et al	whole body	skin	NA	NA	reprogramming	skin development	Development/Differentiation	down	in vivo	mouse	WT	bulk RNA-seq	GSE190665	untreated	treated	22m	22m	NA	[OSKM[2d]+rest[5d]]*[10m]	5d	NA	figure 4f	37118377	OSKM
Browder et al	whole body	skin	NA	NA	reprogramming	keratinocyte differentiation	Development/Differentiation	down	in vivo	mouse	WT	bulk RNA-seq	GSE190665	untreated	treated	22m	22m	NA	[OSKM[2d]+rest[5d]]*[7m]	5d	NA	figure 4f	37118377	OSKM
Browder et al	whole body	skin	NA	NA	reprogramming	keratinocyte differentiation	Development/Differentiation	down	in vivo	mouse	WT	bulk RNA-seq	GSE190665	untreated	treated	22m	22m	NA	[OSKM[2d]+rest[5d]]*[10m]	5d	NA	figure 4f	37118377	OSKM
Browder et al	whole body	skin	NA	NA	reprogramming	epidermal cell differentiation	Development/Differentiation	down	in vivo	mouse	WT	bulk RNA-seq	GSE190665	untreated	treated	22m	22m	NA	[OSKM[2d]+rest[5d]]*[7m]	5d	NA	figure 4f	37118377	OSKM
Browder et al	whole body	skin	NA	NA	reprogramming	epidermal cell differentiation	Development/Differentiation	down	in vivo	mouse	WT	bulk RNA-seq	GSE190665	untreated	treated	22m	22m	NA	[OSKM[2d]+rest[5d]]*[10m]	5d	NA	figure 4f	37118377	OSKM
C Wang et al	myofiber	EDL muscle	NA	NA	reprogramming	cellular response to stimuli	Stress Response	down	in vivo	mouse	WT	bulk RNA-seq	GSE148911	untreated	treated	2m	2m	NA	OSKM[8.5d]	NA	NA	text	34035273	OSKM
C Wang et al	myofiber	EDL muscle	NA	NA	reprogramming	cytoskeletal organization	Cytoskeletal	up	in vivo	mouse	WT	bulk RNA-seq	GSE148911	untreated	treated	2m	2m	NA	OSKM[8.5d]	NA	NA	figure 1h	34035273	OSKM
C Wang et al	myofiber	EDL muscle	NA	NA	reprogramming	oxidative phosphorylation	Energetics	down	in vivo	mouse	WT	bulk RNA-seq	GSE148911	untreated	treated	2m	2m	NA	OSKM[2.5d]	NA	NA	figure 1h	34035273	OSKM
C Wang et al	myofiber	EDL muscle	NA	NA	reprogramming	cytoskeletal organization	Cytoskeletal	up	in vivo	mouse	WT	bulk RNA-seq	GSE148911	untreated	treated	2m	2m	NA	OSKM[2.5d]	NA	NA	figure 1h	34035273	OSKM
C Wang et al	myofiber	EDL muscle	NA	NA	reprogramming	oxidative phosphorylation	Energetics	down	in vivo	mouse	WT	bulk RNA-seq	GSE148911	untreated	treated	2m	2m	NA	OSKM[8.5d]	NA	NA	figure 1h	34035273	OSKM
C Wang et al	myofiber	EDL muscle	NA	NA	reprogramming	myeloid/neutrophil mediated immunity	Immune	up	in vivo	mouse	WT	bulk RNA-seq	GSE148911	untreated	treated	2m	2m	NA	OSKM[8.5d]	NA	NA	figure 1h	34035273	OSKM
C Wang et al	myofiber	EDL muscle	NA	NA	reprogramming	myeloid/neutrophil mediated immunity	Immune	up	in vivo	mouse	WT	bulk RNA-seq	GSE148911	untreated	treated	2m	2m	NA	OSKM[2.5d]	NA	NA	figure 1h	34035273	OSKM
C Wang et al	myofiber	EDL muscle	NA	NA	reprogramming	cytoskeletal organization	Cytoskeletal	up	in vivo	mouse	WT	bulk RNA-seq	GSE148911	untreated	treated	2m	2m	NA	OSKM[2.5d]	NA	NA	figure s2b	34035273	OSKM
C Wang et al	myofiber	EDL muscle	NA	NA	reprogramming	metabolism	Metabolism	down	in vivo	mouse	WT	bulk RNA-seq	GSE148911	untreated	treated	2m	2m	NA	OSKM[2.5d]	NA	NA	figure s2b	34035273	OSKM
C Wang et al	myofiber	EDL muscle	NA	NA	reprogramming	cytoskeletal organization	Cytoskeletal	up	in vivo	mouse	WT	bulk RNA-seq	GSE148911	untreated	treated	2m	2m	NA	OSKM[8.5d]	NA	NA	figure s2b	34035273	OSKM
C Wang et al	myofiber	EDL muscle	NA	NA	reprogramming	metabolism	Metabolism	down	in vivo	mouse	WT	bulk RNA-seq	GSE148911	untreated	treated	2m	2m	NA	OSKM[8.5d]	NA	NA	figure s2b	34035273	OSKM
C Wang et al	myofiber	SOL muscle	NA	NA	reprogramming	metabolism	Metabolism	down	in vivo	mouse	WT	bulk RNA-seq	GSE148911	untreated	treated	2m	2m	NA	OSKM[2.5d]	NA	NA	figure s2b	34035273	OSKM
C Wang et al	myofiber	SOL muscle	NA	NA	reprogramming	metabolism	Metabolism	down	in vivo	mouse	WT	bulk RNA-seq	GSE148911	untreated	treated	2m	2m	NA	OSKM[8.5d]	NA	NA	figure s2b	34035273	OSKM
C Wang et al	myofiber	EDL muscle	NA	NA	reprogramming	response to endoplasmic reticulum stress	Stress Response	up	in vivo	mouse	WT	bulk RNA-seq	GSE148911	untreated	treated	2m	2m	NA	OSKM[2.5d]	NA	NA	figure s2b	34035273	OSKM
C Wang et al	myofiber	EDL muscle	NA	NA	reprogramming	response to endoplasmic reticulum stress	Stress Response	up	in vivo	mouse	WT	bulk RNA-seq	GSE148911	untreated	treated	2m	2m	NA	OSKM[8.5d]	NA	NA	figure s2b	34035273	OSKM
C Wang et al	myofiber	EDL muscle	NA	NA	reprogramming	signal transduction by p53 class mediator	p53	up	in vivo	mouse	WT	bulk RNA-seq	GSE148911	untreated	treated	2m	2m	NA	OSKM[2.5d]	NA	NA	figure s2b	34035273	OSKM
C Wang et al	myofiber	EDL muscle	NA	NA	reprogramming	signal transduction by p53 class mediator	p53	up	in vivo	mouse	WT	bulk RNA-seq	GSE148911	untreated	treated	2m	2m	NA	OSKM[8.5d]	NA	NA	figure s2b	34035273	OSKM
C Wang et al	myofiber	EDL muscle	NA	NA	reprogramming	regulation of microtubule-based process	Cytoskeletal	up	in vivo	mouse	WT	bulk RNA-seq	GSE148911	untreated	treated	2m	2m	NA	OSKM[2.5d]	NA	NA	figure s2b	34035273	OSKM
C Wang et al	myofiber	EDL muscle	NA	NA	reprogramming	regulation of microtubule-based process	Cytoskeletal	up	in vivo	mouse	WT	bulk RNA-seq	GSE148911	untreated	treated	2m	2m	NA	OSKM[8.5d]	NA	NA	figure s2b	34035273	OSKM
C Wang et al	myofiber	EDL muscle	NA	NA	reprogramming	telomere organization		up	in vivo	mouse	WT	bulk RNA-seq	GSE148911	untreated	treated	2m	2m	NA	OSKM[2.5d]	NA	NA	figure s2b	34035273	OSKM
C Wang et al	myofiber	EDL muscle	NA	NA	reprogramming	telomere organization		up	in vivo	mouse	WT	bulk RNA-seq	GSE148911	untreated	treated	2m	2m	NA	OSKM[8.5d]	NA	NA	figure s2b	34035273	OSKM
C Wang et al	myofiber	EDL muscle	NA	NA	reprogramming	regulation of vasculature development	Development/Differentiation	down	in vivo	mouse	WT	bulk RNA-seq	GSE148911	untreated	treated	2m	2m	NA	OSKM[2.5d]	NA	NA	figure s2b	34035273	OSKM
C Wang et al	myofiber	EDL muscle	NA	NA	reprogramming	regulation of vasculature development	Development/Differentiation	down	in vivo	mouse	WT	bulk RNA-seq	GSE148911	untreated	treated	2m	2m	NA	OSKM[8.5d]	NA	NA	figure s2b	34035273	OSKM
C Wang et al	myofiber	SOL muscle	NA	NA	reprogramming	regulation of vasculature development	Development/Differentiation	down	in vivo	mouse	WT	bulk RNA-seq	GSE148911	untreated	treated	2m	2m	NA	OSKM[2.5d]	NA	NA	figure s2b	34035273	OSKM
C Wang et al	myofiber	SOL muscle	NA	NA	reprogramming	regulation of vasculature development	Development/Differentiation	down	in vivo	mouse	WT	bulk RNA-seq	GSE148911	untreated	treated	2m	2m	NA	OSKM[8.5d]	NA	NA	figure s2b	34035273	OSKM
C Wang et al	myofiber	EDL muscle	NA	NA	reprogramming	myoblast differentiation	Development/Differentiation	down	in vivo	mouse	WT	bulk RNA-seq	GSE148911	untreated	treated	2m	2m	NA	OSKM[2.5d]	NA	NA	figure s2b	34035273	OSKM
C Wang et al	myofiber	EDL muscle	NA	NA	reprogramming	myoblast differentiation	Development/Differentiation	down	in vivo	mouse	WT	bulk RNA-seq	GSE148911	untreated	treated	2m	2m	NA	OSKM[8.5d]	NA	NA	figure s2b	34035273	OSKM
C Wang et al	myofiber	SOL muscle	NA	NA	reprogramming	myoblast differentiation	Development/Differentiation	down	in vivo	mouse	WT	bulk RNA-seq	GSE148911	untreated	treated	2m	2m	NA	OSKM[2.5d]	NA	NA	figure s2b	34035273	OSKM
C Wang et al	myofiber	SOL muscle	NA	NA	reprogramming	myoblast differentiation	Development/Differentiation	down	in vivo	mouse	WT	bulk RNA-seq	GSE148911	untreated	treated	2m	2m	NA	OSKM[8.5d]	NA	NA	figure s2b	34035273	OSKM
C Wang et al	myofiber	EDL muscle	NA	NA	reprogramming	heart morphogenesis	Development/Differentiation	down	in vivo	mouse	WT	bulk RNA-seq	GSE148911	untreated	treated	2m	2m	NA	OSKM[2.5d]	NA	NA	figure s2b	34035273	OSKM
C Wang et al	myofiber	EDL muscle	NA	NA	reprogramming	heart morphogenesis	Development/Differentiation	down	in vivo	mouse	WT	bulk RNA-seq	GSE148911	untreated	treated	2m	2m	NA	OSKM[8.5d]	NA	NA	figure s2b	34035273	OSKM
C Wang et al	myofiber	SOL muscle	NA	NA	reprogramming	heart morphogenesis	Development/Differentiation	down	in vivo	mouse	WT	bulk RNA-seq	GSE148911	untreated	treated	2m	2m	NA	OSKM[2.5d]	NA	NA	figure s2b	34035273	OSKM
C Wang et al	myofiber	SOL muscle	NA	NA	reprogramming	heart morphogenesis	Development/Differentiation	down	in vivo	mouse	WT	bulk RNA-seq	GSE148911	untreated	treated	2m	2m	NA	OSKM[8.5d]	NA	NA	figure s2b	34035273	OSKM
C Wang et al	myofiber	EDL muscle	NA	NA	reprogramming	muscle organ development	Development/Differentiation	down	in vivo	mouse	WT	bulk RNA-seq	GSE148911	untreated	treated	2m	2m	NA	OSKM[2.5d]	NA	NA	figure s2b	34035273	OSKM
C Wang et al	myofiber	EDL muscle	NA	NA	reprogramming	muscle organ development	Development/Differentiation	down	in vivo	mouse	WT	bulk RNA-seq	GSE148911	untreated	treated	2m	2m	NA	OSKM[8.5d]	NA	NA	figure s2b	34035273	OSKM
C Wang et al	myofiber	SOL muscle	NA	NA	reprogramming	muscle organ development	Development/Differentiation	down	in vivo	mouse	WT	bulk RNA-seq	GSE148911	untreated	treated	2m	2m	NA	OSKM[2.5d]	NA	NA	figure s2b	34035273	OSKM
C Wang et al	myofiber	SOL muscle	NA	NA	reprogramming	muscle organ development	Development/Differentiation	down	in vivo	mouse	WT	bulk RNA-seq	GSE148911	untreated	treated	2m	2m	NA	OSKM[8.5d]	NA	NA	figure s2b	34035273	OSKM
Chen et al	cardiomyocyte	heart	cardiomyocyte	NA	reprogramming	cell cycle	Proliferation	no change	in vivo	mouse	WT	bulk RNA-seq	GSE160918	untreated	treated	9-16w	9-16w	NA	OSKM[6d]+rest[6d]	6d	NA	figure 1e	34554778	OSKM
Chen et al	cardiomyocyte	heart	cardiomyocyte	NA	reprogramming	cell cycle	Proliferation	up	in vivo	mouse	WT	bulk RNA-seq	GSE160918	untreated	treated	9-16w	9-16w	NA	OSKM[6d]	NA	NA	figure 1e	34554778	OSKM
Chen et al	cardiomyocyte	heart	cardiomyocyte	NA	reprogramming	cell division	Proliferation	down	in vivo	mouse	WT	bulk RNA-seq	GSE160918	untreated	treated	9-16w	9-16w	NA	OSKM[6d]+rest[6d]	6d	NA	figure 1e	34554778	OSKM
Chen et al	cardiomyocyte	heart	cardiomyocyte	NA	reprogramming	cell division	Proliferation	up	in vivo	mouse	WT	bulk RNA-seq	GSE160918	untreated	treated	9-16w	9-16w	NA	OSKM[6d]	NA	NA	figure 1e	34554778	OSKM
Chen et al	cardiomyocyte	heart	cardiomyocyte	NA	reprogramming	fatty acid metabolism	Energetics	up	in vivo	mouse	WT	bulk RNA-seq	GSE160918	untreated	treated	9-16w	9-16w	NA	OSKM[6d]+rest[6d]	6d	NA	figure 1e	34554778	OSKM
Chen et al	cardiomyocyte	heart	cardiomyocyte	NA	reprogramming	fatty acid metabolism	Energetics	down	in vivo	mouse	WT	bulk RNA-seq	GSE160918	untreated	treated	9-16w	9-16w	NA	OSKM[6d]	NA	NA	figure 1e	34554778	OSKM
Chen et al	cardiomyocyte	heart	cardiomyocyte	NA	reprogramming	biological adhesion	Cell Adhesion	no change	in vivo	mouse	WT	bulk RNA-seq	GSE160918	untreated	treated	9-16w	9-16w	NA	OSKM[6d]+rest[6d]	6d	NA	figure 1e	34554778	OSKM
Chen et al	cardiomyocyte	heart	cardiomyocyte	NA	reprogramming	biological adhesion	Cell Adhesion	no change	in vivo	mouse	WT	bulk RNA-seq	GSE160918	untreated	treated	9-16w	9-16w	NA	OSKM[6d]	NA	NA	figure 1e	34554778	OSKM
Chen et al	cardiomyocyte	heart	cardiomyocyte	NA	reprogramming	muscle system process	Development/Differentiation	up	in vivo	mouse	WT	bulk RNA-seq	GSE160918	untreated	treated	9-16w	9-16w	NA	OSKM[6d]+rest[6d]	6d	NA	figure 1e	34554778	OSKM
Chen et al	cardiomyocyte	heart	cardiomyocyte	NA	reprogramming	muscle system process	Development/Differentiation	down	in vivo	mouse	WT	bulk RNA-seq	GSE160918	untreated	treated	9-16w	9-16w	NA	OSKM[6d]	NA	NA	figure 1e	34554778	OSKM
Chen et al	cardiomyocyte	heart	cardiomyocyte	NA	reprogramming	biological adhesion	Cell Adhesion	no change	in vivo	mouse	WT	bulk RNA-seq	GSE160918	untreated	treated	9-16w	9-16w	NA	OSKM[12d]	NA	NA	figure 1e	34554778	OSKM
Chen et al	cardiomyocyte	heart	cardiomyocyte	NA	reprogramming	cell cycle	Proliferation	up	in vivo	mouse	WT	bulk RNA-seq	GSE160918	untreated	treated	9-16w	9-16w	NA	OSKM[12d]	NA	NA	figure 1e	34554778	OSKM
Chen et al	cardiomyocyte	heart	cardiomyocyte	NA	reprogramming	cell division	Proliferation	up	in vivo	mouse	WT	bulk RNA-seq	GSE160918	untreated	treated	9-16w	9-16w	NA	OSKM[12d]	NA	NA	figure 1e	34554778	OSKM
Chen et al	cardiomyocyte	heart	cardiomyocyte	NA	reprogramming	muscle system process	Development/Differentiation	down	in vivo	mouse	WT	bulk RNA-seq	GSE160918	untreated	treated	9-16w	9-16w	NA	OSKM[12d]	NA	NA	figure 1e	34554778	OSKM
Chen et al	cardiomyocyte	heart	cardiomyocyte	NA	reprogramming	fatty acid metabolism	Energetics	down	in vivo	mouse	WT	bulk RNA-seq	GSE160918	untreated	treated	9-16w	9-16w	NA	OSKM[12d]	NA	NA	figure 1e	34554778	OSKM
Chen et al	cardiomyocyte	heart	cardiomyocyte	NA	reprogramming	endodermal cell specification	Development/Differentiation	up	in vivo	mouse	WT	bulk RNA-seq	GSE160918	untreated	treated	9-16w	9-16w	NA	OSKM[6d]	NA	NA	figure 1e	34554778	OSKM
Chen et al	cardiomyocyte	heart	cardiomyocyte	NA	reprogramming	endodermal cell specification	Development/Differentiation	up	in vivo	mouse	WT	bulk RNA-seq	GSE160918	untreated	treated	9-16w	9-16w	NA	OSKM[12d]	NA	NA	figure 1e	34554778	OSKM
Chen et al	cardiomyocyte	heart	cardiomyocyte	NA	reprogramming	endodermal cell specification	Development/Differentiation	down	in vivo	mouse	WT	bulk RNA-seq	GSE160918	untreated	treated	9-16w	9-16w	NA	OSKM[6d]+rest[6d]	NA	NA	figure 1e	34554778	OSKM
Chondronasiou et al	whole body	pancreas	NA	NA	aging	mTOR signaling pathway	mTOR	up	in vivo	mouse	WT	bulk RNA-seq	GSE156558	untreated	untreated	13w	55w	NA	NA	NA	NA	figure 2c	35235716	NA
Chondronasiou et al	whole body	pancreas	NA	NA	aging	DNA replication		down	in vivo	mouse	WT	bulk RNA-seq	GSE156558	untreated	untreated	13w	55w	NA	NA	NA	NA	figure 2d	35235716	NA
Chondronasiou et al	whole body	pancreas	NA	NA	reprogramming	mTOR signaling pathway	mTOR	down	in vivo	mouse	WT	bulk RNA-seq	GSE156558	untreated	treated	55w	55w	NA	OSKM[1w]+rest[2w]	2w	NA	figure 2c	35235716	OSKM
Chondronasiou et al	whole body	pancreas	NA	NA	reprogramming	DNA replication		up	in vivo	mouse	WT	bulk RNA-seq	GSE156558	untreated	treated	55w	55w	NA	OSKM[1w]+rest[2w]	2w	NA	figure 2d	35235716	OSKM
Chondronasiou et al	whole body	pancreas	NA	NA	aging	NADPH	Metabolism	down	in vivo	mouse	WT	bulk RNA-seq	GSE156558	untreated	untreated	13w	55w	NA	NA	NA	NA	figure 2e	35235716	NA
Chondronasiou et al	whole body	pancreas	NA	NA	reprogramming	NADPH	Metabolism	up	in vivo	mouse	WT	bulk RNA-seq	GSE156558	untreated	treated	55w	55w	NA	OSKM[1w]+rest[2w]	2w	NA	figure 2e	35235716	OSKM
Chondronasiou et al	whole body	pancreas	NA	NA	aging	fatty acid beta-oxidation	Energetics	down	in vivo	mouse	WT	bulk RNA-seq	GSE156558	untreated	untreated	13w	55w	NA	NA	NA	NA	figure 2e	35235716	NA
Chondronasiou et al	whole body	pancreas	NA	NA	reprogramming	fatty acid beta-oxidation	Energetics	up	in vivo	mouse	WT	bulk RNA-seq	GSE156558	untreated	treated	55w	55w	NA	OSKM[1w]+rest[2w]	2w	NA	figure 2e	35235716	OSKM
Chondronasiou et al	whole body	pancreas	NA	NA	aging	pyrimidine metabolism	Metabolism	down	in vivo	mouse	WT	bulk RNA-seq	GSE156558	untreated	untreated	13w	55w	NA	NA	NA	NA	figure 2e	35235716	NA
Chondronasiou et al	whole body	pancreas	NA	NA	reprogramming	pyrimidine metabolism	Metabolism	up	in vivo	mouse	WT	bulk RNA-seq	GSE156558	untreated	treated	55w	55w	NA	OSKM[1w]+rest[2w]	2w	NA	figure 2e	35235716	OSKM
Chondronasiou et al	whole body	pancreas	NA	NA	aging	MCM complex	DNA Repair	down	in vivo	mouse	WT	bulk RNA-seq	GSE156558	untreated	untreated	13w	55w	NA	NA	NA	NA	figure 2f	35235716	NA
Chondronasiou et al	whole body	pancreas	NA	NA	reprogramming	MCM complex	DNA Repair	up	in vivo	mouse	WT	bulk RNA-seq	GSE156558	untreated	treated	55w	55w	NA	OSKM[1w]+rest[2w]	2w	NA	figure 2f	35235716	OSKM
Chondronasiou et al	whole body	pancreas	NA	NA	aging	mismatch repair	DNA Repair	down	in vivo	mouse	WT	bulk RNA-seq	GSE156558	untreated	untreated	13w	55w	NA	NA	NA	NA	figure 2f	35235716	NA
Chondronasiou et al	whole body	pancreas	NA	NA	reprogramming	mismatch repair	DNA Repair	up	in vivo	mouse	WT	bulk RNA-seq	GSE156558	untreated	treated	55w	55w	NA	OSKM[1w]+rest[2w]	2w	NA	figure 2f	35235716	OSKM
Chondronasiou et al	whole body	pancreas	NA	NA	aging	proteasome	Proteasome	down	in vivo	mouse	WT	bulk RNA-seq	GSE156558	untreated	untreated	13w	55w	NA	NA	NA	NA	figure 2g	35235716	NA
Chondronasiou et al	whole body	pancreas	NA	NA	aging	collagen	ECM	down	in vivo	mouse	WT	bulk RNA-seq	GSE156558	untreated	untreated	13w	55w	NA	NA	NA	NA	figure 2h	35235716	NA
Chondronasiou et al	whole body	pancreas	NA	NA	reprogramming	collagen	ECM	up	in vivo	mouse	WT	bulk RNA-seq	GSE156558	untreated	treated	55w	55w	NA	OSKM[1w]+rest[2w]	2w	NA	figure 2h	35235716	OSKM
Francesconi et al	NA	bone marrow	pre-B cells	NA	reprogramming	EMT	EMT	up	in vitro	mouse	WT	scRNA-seq	GSE112004	treated	treated	NA	NA	OSKM[d4]	OSKM[d6]	0d	NA	figure 1s3l	30860479	OSKM
Francesconi et al	NA	bone marrow	pre-B cells	NA	reprogramming	EMT	EMT	up	in vitro	mouse	WT	scRNA-seq	GSE112004	untreated	treated	NA	NA	NA	OSKM[42h]	0d	NA	figure 1s3k	30860479	OSKM
Francesconi et al	NA	bone marrow	pre-B cells	NA	reprogramming	inflammation	Inflammation	up	in vitro	mouse	WT	scRNA-seq	GSE112004	untreated	treated	NA	NA	NA	OSKM[42h]	0d	NA	figure 1s3k	30860479	OSKM
Francesconi et al	NA	bone marrow	pre-B cells	NA	reprogramming	B cell markers	Development/Differentiation	down	in vitro	mouse	WT	scRNA-seq	GSE112004	untreated	treated	NA	NA	NA	OSKM[42h]	0d	NA	figure 1s3k	30860479	OSKM
Francesconi et al	NA	bone marrow	pre-B cells	NA	reprogramming	B cell markers	Development/Differentiation	down	in vitro	mouse	WT	scRNA-seq	GSE112004	untreated	treated	NA	NA	NA	OSKM[d2]	0d	NA	figure 1s3k	30860479	OSKM
Francesconi et al	NA	bone marrow	pre-B cells	NA	reprogramming	biosynthetic pathways		up	in vitro	mouse	WT	scRNA-seq	GSE112004	untreated	treated	NA	NA	NA	OSKM[d2]	0d	NA	figure 1s3k	30860479	OSKM
Francesconi et al	NA	bone marrow	pre-B cells	NA	reprogramming	energy metabolism	Energetics	up	in vitro	mouse	WT	scRNA-seq	GSE112004	untreated	treated	NA	NA	NA	OSKM[d2]	0d	NA	figure 1s3k	30860479	OSKM
Francesconi et al	NA	bone marrow	pre-B cells	NA	reprogramming	stem cell proliferation	Proliferation	up	in vitro	mouse	WT	scRNA-seq	GSE112004	treated	treated	NA	NA	OSKM[d4]	OSKM[d6]	0d	NA	figure 1s3l	30860479	OSKM
Francesconi et al	NA	bone marrow	pre-B cells	NA	reprogramming	DNA replication		up	in vitro	mouse	WT	scRNA-seq	GSE112004	treated	treated	NA	NA	OSKM[d4]	OSKM[d6]	0d	NA	figure 1s3l	30860479	OSKM
Francesconi et al	NA	bone marrow	pre-B cells	NA	reprogramming	proliferation	Proliferation	up	in vitro	mouse	WT	scRNA-seq	GSE112004	treated	treated	NA	NA	OSKM[d4]	OSKM[d6]	0d	NA	figure 1s3l	30860479	OSKM
Francesconi et al	NA	bone marrow	pre-B cells	NA	reprogramming	myc targets	Proliferation	up	in vitro	mouse	WT	scRNA-seq	GSE112004	treated	treated	NA	NA	OSKM[d4]	OSKM[d6]	0d	NA	figure 1s3l	30860479	OSKM
Francesconi et al	NA	bone marrow	pre-B cells	NA	reprogramming	histone deacetylation	Chromatin Organization	up	in vitro	mouse	WT	scRNA-seq	GSE112004	treated	treated	NA	NA	OSKM[d4]	OSKM[d6]	0d	NA	figure 1s3l	30860479	OSKM
Francesconi et al	NA	bone marrow	pre-B cells	NA	reprogramming	mtorc1	mTOR	up	in vitro	mouse	WT	scRNA-seq	GSE112004	treated	treated	NA	NA	OSKM[d4]	OSKM[d6]	0d	NA	figure 1s3l	30860479	OSKM
Francesconi et al	NA	bone marrow	pre-B cells	NA	reprogramming	embryonic axis specification	Development/Differentiation	up	in vitro	mouse	WT	scRNA-seq	GSE112004	treated	treated	NA	NA	OSKM[d4]	OSKM[d6]	0d	NA	figure 1s3l	30860479	OSKM
Francesconi et al	NA	bone marrow	pre-B cells	NA	reprogramming	inflammation	Inflammation	down	in vitro	mouse	WT	scRNA-seq	GSE112004	treated	treated	NA	NA	OSKM[42h]	OSKM[d2]	0d	NA	figure 1s3k	30860479	OSKM
Francesconi et al	NA	bone marrow	pre-B cells	NA	reprogramming	WNT pathway	Development/Differentiation	up	in vitro	mouse	WT	scRNA-seq	GSE112004	treated	treated	NA	NA	OSKM[d4]	OSKM[d6]	0d	NA	figure 1s3l	30860479	OSKM
Francesconi et al	NA	bone marrow	pre-B cells	NA	reprogramming	hypoxia	Stress Response	up	in vitro	mouse	WT	scRNA-seq	GSE112004	treated	treated	NA	NA	OSKM[d4]	OSKM[d6]	0d	NA	figure 1s3l	30860479	OSKM
Francesconi et al	NA	bone marrow	pre-B cells	NA	reprogramming	apoptosis	Apoptosis	up	in vitro	mouse	WT	scRNA-seq	GSE112004	treated	treated	NA	NA	OSKM[d4]	OSKM[d6]	0d	NA	figure 1s3l	30860479	OSKM
G Wang et al	NA	adipose	stem cell	AD-MSC	reprogramming	limb development	Development/Differentiation	up	in vitro	human	WT	single-nuclei transcriptome	GSE213711	untreated	treated[stage I]	NA	NA	NA	chemical[stage I]	NA	stage I: CHIR999021+616452[“RepSox”]+TTNPB+SAG+EPZ5676+DZNep+Ruxolitinib+VTP50469+AKTi[9d]	figure s2i	37224020	chemical
G Wang et al	NA	adipose	stem cell	AD-MSC	reprogramming	ECM organization	ECM	down	in vitro	human	WT	single-nuclei transcriptome	GSE213711	untreated	treated[stage I]	NA	NA	NA	chemical[stage I]	NA	stage I: CHIR999021+616452[“RepSox”]+TTNPB+SAG+EPZ5676+DZNep+Ruxolitinib+VTP50469+AKTi[9d]	figure s1d	37224020	chemical
G Wang et al	NA	adipose	stem cell	AD-MSC	reprogramming	cell cycle	Proliferation	up	in vitro	human	WT	scRNA-seq	GSE213712	untreated	treated[stage II]	NA	NA	NA	chemical[stage II]	NA	stage I: CHIR999021+616452[“RepSox”]+TTNPB+SAG+EPZ5676+DZNep+Ruxolitinib+VTP50469+AKTi[9d]; stage II: CHIR99021+616452[“RepSox”]+TTNPB+ SAG+EPZ5676+DZNep+Ruxolitinib+VTP50469+Y-27632+JNKIN8+BIRB796+SGC-CBP30+Dorsomorphin 5-Iodotubercidin[16d]	figure s1d	37224020	chemical
Gill et al	NA	skin	fibroblast	dermal fibroblast	reprogramming	response to lipopolysaccharide	Inflammation	up	in vitro	human	WT	bulk RNA-seq	GSE165177	untreated	OSKM	38–53y	38–53y	NA	OSKM[10-17d]	4-5wk	NA	figure 2s1d	35390271	OSKM
Gill et al	NA	skin	fibroblast	dermal fibroblast	reprogramming	multi-tissue epigenetic clock	Aging	down	in vitro	human	WT	methylation array	GSE165180	untreated	OSKM[10d]	38–53y	38–53y	NA	OSKM[10d]	4-5wk	NA	figure 1a	35390271	OSKM
Gill et al	NA	skin	fibroblast	dermal fibroblast	reprogramming	multi-tissue epigenetic clock	Aging	down	in vitro	human	WT	methylation array	GSE165180	untreated	OSKM[17d]	38–53y	38–53y	NA	OSKM[17d]	4-5wk	NA	figure 1a	35390271	OSKM
Gill et al	NA	skin	fibroblast	dermal fibroblast	reprogramming	skin and blood clock	Aging	down	in vitro	human	WT	methylation array	GSE165180	untreated	OSKM[17d]	38–53y	38–53y	NA	OSKM[17d]	4-5wk	NA	figure 1a	35390271	OSKM
Gill et al	NA	skin	fibroblast	dermal fibroblast	reprogramming	epiTOC	Aging	no change	in vitro	human	WT	methylation array	GSE165180	untreated	OSKM[17d]	38–53y	38–53y	NA	OSKM[17d]	4-5wk	NA	figure 1a	35390271	OSKM
Gill et al	NA	skin	fibroblast	dermal fibroblast	reprogramming	GrimAge	Aging	no change	in vitro	human	WT	methylation array	GSE165180	untreated	OSKM[17d]	38–53y	38–53y	NA	OSKM[17d]	4-5wk	NA	figure 1a	35390271	OSKM
Gill et al	NA	skin	fibroblast	dermal fibroblast	reprogramming	Hannum	Aging	no change	in vitro	human	WT	methylation array	GSE165180	untreated	OSKM[17d]	38–53y	38–53y	NA	OSKM[17d]	4-5wk	NA	figure 1a	35390271	OSKM
Gill et al	NA	skin	fibroblast	dermal fibroblast	reprogramming	PhenoAge	Aging	no change	in vitro	human	WT	methylation array	GSE165180	untreated	OSKM[17d]	38–53y	38–53y	NA	OSKM[17d]	4-5wk	NA	figure 1a	35390271	OSKM
Gill et al	NA	skin	fibroblast	dermal fibroblast	reprogramming	Weidner	Aging	no change	in vitro	human	WT	methylation array	GSE165180	untreated	OSKM[17d]	38–53y	38–53y	NA	OSKM[17d]	4-5wk	NA	figure 1a	35390271	OSKM
Gill et al	NA	skin	fibroblast	dermal fibroblast	reprogramming	skin and blood clock	Aging	down	in vitro	human	WT	methylation array	GSE165180	untreated	OSKM[10d]	38–53y	38–53y	NA	OSKM[50d]	4-5wk	NA	figure 1a	35390271	OSKM
Gill et al	NA	skin	fibroblast	dermal fibroblast	reprogramming	epiTOC	Aging	no change	in vitro	human	WT	methylation array	GSE165180	untreated	OSKM[10d]	38–53y	38–53y	NA	OSKM[50d]	4-5wk	NA	figure 1a	35390271	OSKM
Gill et al	NA	skin	fibroblast	dermal fibroblast	reprogramming	GrimAge	Aging	down	in vitro	human	WT	methylation array	GSE165180	untreated	OSKM[10d]	38–53y	38–53y	NA	OSKM[50d]	4-5wk	NA	figure 1a	35390271	OSKM
Gill et al	NA	skin	fibroblast	dermal fibroblast	reprogramming	Hannum	Aging	down	in vitro	human	WT	methylation array	GSE165180	untreated	OSKM[10d]	38–53y	38–53y	NA	OSKM[50d]	4-5wk	NA	figure 1a	35390271	OSKM
Gill et al	NA	skin	fibroblast	dermal fibroblast	reprogramming	PhenoAge	Aging	down	in vitro	human	WT	methylation array	GSE165180	untreated	OSKM[10d]	38–53y	38–53y	NA	OSKM[50d]	4-5wk	NA	figure 1a	35390271	OSKM
Gill et al	NA	skin	fibroblast	dermal fibroblast	reprogramming	Weidner	Aging	down	in vitro	human	WT	methylation array	GSE165180	untreated	OSKM[10d]	38–53y	38–53y	NA	OSKM[50d]	4-5wk	NA	figure 1a	35390271	OSKM
Gill et al	NA	skin	fibroblast	dermal fibroblast	reprogramming	multi-tissue epigenetic clock	Aging	down	in vitro	human	WT	methylation array	GSE165180	untreated	OSKM[10d]	38–53y	38–53y	NA	OSKM[50d]	4-5wk	NA	figure 1a	35390271	OSKM
Gill et al	NA	skin	fibroblast	dermal fibroblast	reprogramming	regulation of cell migration		down	in vitro	human	WT	bulk RNA-seq	GSE165177	untreated	OSKM	38–53y	38–53y	NA	OSKM[10-17d]	4-5wk	NA	figure 2s1d	35390271	OSKM
Gill et al	NA	skin	fibroblast	dermal fibroblast	reprogramming	regulation of IkB/NFkB signaling	Inflammation	down	in vitro	human	WT	bulk RNA-seq	GSE165177	untreated	OSKM	38–53y	38–53y	NA	OSKM[10-17d]	4-5wk	NA	figure 2s1d	35390271	OSKM
Gill et al	NA	skin	fibroblast	dermal fibroblast	reprogramming	ECM	ECM	no change	in vitro	human	WT	bulk RNA-seq	GSE165177	untreated	OSKM	38–53y	38–53y	NA	OSKM[10-17d]	4-5wk	NA	figure 2s1d	35390271	OSKM
Gill et al	NA	skin	fibroblast	dermal fibroblast	reprogramming	collagen fibril organization	ECM	no change	in vitro	human	WT	bulk RNA-seq	GSE165177	untreated	OSKM	38–53y	38–53y	NA	OSKM[10-17d]	4-5wk	NA	figure 2s1d	35390271	OSKM
Gill et al	NA	skin	fibroblast	dermal fibroblast	reprogramming	custom transcriptomic clock	Aging	down	in vitro	human	WT	bulk RNA-seq	GSE165180	untreated	OSKM[13d]	38–53y	38–53y	NA	OSKM[13d]	4-5wk	NA	figure 3c	35390271	OSKM
Gill et al	NA	skin	fibroblast	dermal fibroblast	reprogramming	custom transcriptomic clock	Aging	no change	in vitro	human	WT	bulk RNA-seq	GSE165180	untreated	OSKM[13d]	38–53y	38–53y	NA	OSKM[15d]	4-5wk	NA	figure 3c	35390271	OSKM
Gill et al	NA	skin	fibroblast	dermal fibroblast	reprogramming	custom transcriptomic clock	Aging	down	in vitro	human	WT	bulk RNA-seq	GSE165180	untreated	OSKM[17d]	38–53y	38–53y	NA	OSKM[17d]	4-5wk	NA	figure 3c	35390271	OSKM
Hishida et al	liver	liver	hepatocyte	NA	reprogramming	hepaticobiliary system development	Development/Differentiation	down	in vivo	mouse	WT	bulk RNA-seq	GSE144600	untreated	OSKM[1d]+rest[1d]	2-4m	2-4m	NA	OSKM[1d]	1d	NA	figure 3a	35476977	OSKM
Hishida et al	liver	liver	hepatocyte	NA	reprogramming	metabolic processes	Metabolism	down	in vivo	mouse	WT	bulk RNA-seq	GSE144600	untreated	OSKM[1d]+rest[1d]	2-4m	2-4m	NA	OSKM[1d]	1d	NA	figure 3a	35476977	OSKM
Hishida et al	liver	liver	hepatocyte	NA	reprogramming	p53 targets	p53	up	in vivo	mouse	WT	scRNA-seq	GSE144600	untreated	OSKM[1d]+rest[1d]	2-4m	2-4m	NA	OSKM[1d]	1d	NA	figure 4	35476977	OSKM
Hishida et al	liver	liver	hepatocyte	NA	reprogramming	cell cycle	Proliferation	up	in vivo	mouse	WT	scRNA-seq	GSE144600	untreated	OSKM[1d]+rest[1d]	2-4m	2-4m	NA	OSKM[1d]	1d	NA	figure 4	35476977	OSKM
Kovatcheva et al	NA	embryo	fibroblast	embryonic fibroblast	reprogramming	cell-substrate junction assembly	Cell Adhesion	up	in vitro	mouse	WT	bulk RNA-seq	GSE200579	untreated	treated	embryo	embryo	NA	OSKM[72h]	0d	NA	figure 4d	37973897	OSKM
Kovatcheva et al	NA	embryo	fibroblast	embryonic fibroblast	reprogramming	histone modification	Chromatin Organization	up	in vitro	mouse	WT	bulk RNA-seq	GSE200579	untreated	treated	embryo	embryo	NA	OSKM[72h]	0d	NA	figure 4d	37973897	OSKM
Kovatcheva et al	NA	embryo	fibroblast	embryonic fibroblast	reprogramming	transcription control	Transcription Control	up	in vitro	mouse	WT	bulk RNA-seq	GSE200579	untreated	treated	embryo	embryo	NA	OSKM[72h]	0d	NA	figure 4d	37973897	OSKM
Kovatcheva et al	NA	embryo	fibroblast	embryonic fibroblast	reprogramming	cell-substrate junction assembly	Cell Adhesion	down	in vitro	mouse	WT	bulk RNA-seq	GSE200579	treated	treated	embryo	embryo	OSKM[72h]	OSKM+B12[72h]	0d	NA	figure 4d	37973897	OSKM
Kovatcheva et al	NA	embryo	fibroblast	embryonic fibroblast	reprogramming	histone modification	Chromatin Organization	down	in vitro	mouse	WT	bulk RNA-seq	GSE200579	treated	treated	embryo	embryo	OSKM[72h]	OSKM+B12[72h]	0d	NA	figure 4d	37973897	OSKM
Kovatcheva et al	NA	embryo	fibroblast	embryonic fibroblast	reprogramming	transcription control	Transcription Control	down	in vitro	mouse	WT	bulk RNA-seq	GSE200579	treated	treated	embryo	embryo	OSKM[72h]	OSKM+B12[72h]	0d	NA	figure 4d	37973897	OSKM
Kovatcheva et al	NA	embryo	fibroblast	embryonic fibroblast	reprogramming	cryptic transcription	Transcription Control	up	in vitro	mouse	WT	bulk RNA-seq	GSE200579	untreated	treated	embryo	embryo	NA	OSKM[72h]	0d	NA	figure 4d	37973897	OSKM
Kovatcheva et al	NA	embryo	fibroblast	embryonic fibroblast	reprogramming	cryptic transcription	Transcription Control	down	in vitro	mouse	WT	bulk RNA-seq	GSE200579	treated	treated	embryo	embryo	OSKM[72h]	OSKM+B12[72h]	0d	NA	figure 4d	37973897	OSKM
Kovatcheva et al	NA	embryo	fibroblast	embryonic fibroblast	reprogramming	reprogramming score		up	in vitro	mouse	WT	bulk RNA-seq	GSE200579	untreated	treated	embryo	embryo	NA	OSKM[72h]	0d	NA	figure s7b	37973897	OSKM
Kovatcheva et al	NA	embryo	fibroblast	embryonic fibroblast	reprogramming	reprogramming score		up	in vitro	mouse	WT	bulk RNA-seq	GSE200579	treated	treated	embryo	embryo	OSKM[72h]	OSKM+B12[72h]	0d	NA	figure s7b	37973897	OSKM
Kovatcheva et al	NA	embryo	fibroblast	embryonic fibroblast	reprogramming	H3K36me3	Chromatin Organization	down	in vitro	mouse	WT	ChIP–seq	GSE200579	untreated	treated	embryo	embryo	NA	OSKM[72h]	0d	NA	figure 4a	37973897	OSKM
Kovatcheva et al	NA	embryo	fibroblast	embryonic fibroblast	reprogramming	H3K36me3	Chromatin Organization	up	in vitro	mouse	WT	ChIP–seq	GSE200579	treated	treated	embryo	embryo	OSKM[72h]	OSKM+B12[72h]	0d	NA	figure 4a	37973897	OSKM
Liuyang et al	NA	dermal	fibroblast	dermal fibroblast	reprogramming	fibroblast markers	Development/Differentiation	down	in vitro	human	WT	scRNA-seq	HRA003013	untreated	treated	adult	adult	NA	chemical[stage II]	NA	stage I: CHIR999021+616452+TTNPB+SAG+EPZ5676+DZNep+Ruxolitinib +VTP50469+AKT Kinase Inhibitor +JNKIN8+SETD2-IN-1[~8d]; stage II: CHIR99021+Y-27632+PD0325901+SB590885[~8-12d]	figure 3d	36944335	chemical
Liuyang et al	NA	dermal	fibroblast	dermal fibroblast	reprogramming	intermediate plastic state genes	Development/Differentiation	up	in vitro	human	WT	scRNA-seq	HRA003013	untreated	treated	adult	adult	NA	chemical[stage II]	NA	stage I: CHIR999021+616452+TTNPB+SAG+EPZ5676+DZNep+Ruxolitinib +VTP50469+AKT Kinase Inhibitor +JNKIN8+SETD2-IN-1[~8d]; stage II: CHIR99021+Y-27632+PD0325901+SB590885[~8-12d]	figure 3d	36944335	chemical
Liuyang et al	NA	dermal	fibroblast	dermal fibroblast	reprogramming	naïve pluripotency genes	Development/Differentiation	up	in vitro	human	WT	scRNA-seq	HRA003013	untreated	treated	adult	adult	NA	chemical[stage III]	NA	stage I: CHIR999021+616452+TTNPB+SAG+EPZ5676+DZNep+Ruxolitinib +VTP50469+AKT Kinase Inhibitor +JNKIN8+SETD2-IN-1[~8d]; stage II: CHIR99021+Y-27632+PD0325901+SB590885[~8-12d]; stage III: VPA[~8d]+Tranylcypromine[~4d]+DZNep[~4d]+EPZ56[~4d]	figure 3d	36944335	chemical
Liuyang et al	NA	dermal	fibroblast	dermal fibroblast	reprogramming	pluripotency genes	Development/Differentiation	up	in vitro	human	WT	scRNA-seq	HRA003013	untreated	treated	adult	adult	NA	chemical[stage III]	NA	stage I: CHIR999021+616452+TTNPB+SAG+EPZ5676+DZNep+Ruxolitinib +VTP50469+AKT Kinase Inhibitor +JNKIN8+SETD2-IN-1[~8d]; stage II: CHIR99021+Y-27632+PD0325901+SB590885[~8-12d]; stage III: VPA[~8d]+Tranylcypromine[~4d]+DZNep[~4d]+EPZ56[~4d]	figure 3d	36944335	chemical
Mitchell et al	NA	skin	fibroblast	NA	reprogramming	splicing damage	Transcription Control	down	in vitro	mouse	WT	bulk RNA-seq	GSE247199	untreated	treated	4m	4m	NA	chemical[7c]	NA	7c: repsox, trans-2-phenylcyclopropylamine, DZNep, TTNPB, CHIR99021, forskolin, and valproic acid[6d]	figure 2d	38517750	chemical
Mitchell et al	NA	skin	fibroblast	NA	reprogramming	splicing damage	Transcription Control	down	in vitro	mouse	WT	bulk RNA-seq	GSE247199	untreated	treated	20m	20m	NA	chemical[7c]	NA	7c: repsox, trans-2-phenylcyclopropylamine, DZNep, TTNPB, CHIR99021, forskolin, and valproic acid[6d]	figure 2d	38517750	chemical
Mitchell et al	NA	skin	fibroblast	NA	reprogramming	splicing damage	Transcription Control	no change	in vitro	mouse	WT	bulk RNA-seq	GSE247199	untreated	treated	4m	4m	NA	chemical[2c]	NA	2c: repsox, trans-2-phenylcyclopropylamine[6d]	figure 2d	38517750	chemical
Mitchell et al	NA	skin	fibroblast	NA	reprogramming	splicing damage	Transcription Control	no change	in vitro	mouse	WT	bulk RNA-seq	GSE247199	untreated	treated	20m	20m	NA	chemical[2c]	NA	2c: repsox, trans-2-phenylcyclopropylamine[6d]	figure 2d	38517750	chemical
Mitchell et al	NA	skin	fibroblast	NA	aging	splicing damage	Transcription Control	no change	in vitro	mouse	WT	bulk RNA-seq	GSE247199	untreated	untreated	4m	20m	NA	NA	NA	NA	figure 2d	38517750	NA
Mitchell et al	NA	skin	fibroblast	NA	reprogramming	aging signatures	Aging	down	in vitro	mouse	WT	bulk RNA-seq	GSE247199	untreated	treated	20m	20m	NA	chemical[2c]	NA	2c: repsox, trans-2-phenylcyclopropylamine[6d]	figure 2e	38517750	chemical
Mitchell et al	NA	skin	fibroblast	NA	reprogramming	mtorc1 signaling	mTOR	up	in vitro	mouse	WT	proteomics	GSE247199	untreated	treated	20m	20m	NA	chemical[7c]	NA	7c: repsox, trans-2-phenylcyclopropylamine, DZNep, TTNPB, CHIR99021, forskolin, and valproic acid[6d]	figure 2s1c	38517750	chemical
Mitchell et al	NA	skin	fibroblast	NA	aging	mtorc1 signaling	mTOR	up	in vitro	mouse	WT	proteomics	GSE247199	untreated	treated	4m	20m	NA	chemical[7c]	NA	7c: repsox, trans-2-phenylcyclopropylamine, DZNep, TTNPB, CHIR99021, forskolin, and valproic acid[6d]	figure 2s1c	38517750	chemical
Mitchell et al	NA	skin	fibroblast	NA	reprogramming	apoptosis	Apoptosis	down	in vitro	mouse	WT	proteomics	GSE247199	untreated	treated	20m	20m	NA	chemical[7c]	NA	7c: repsox, trans-2-phenylcyclopropylamine, DZNep, TTNPB, CHIR99021, forskolin, and valproic acid[6d]	figure 3d	38517750	chemical
Mitchell et al	NA	skin	fibroblast	NA	reprogramming	DNA repair	DNA Repair	down	in vitro	mouse	WT	proteomics	GSE247199	untreated	treated	20m	20m	NA	chemical[7c]	NA	7c: repsox, trans-2-phenylcyclopropylamine, DZNep, TTNPB, CHIR99021, forskolin, and valproic acid[6d]	figure 3d	38517750	chemical
Mitchell et al	NA	skin	fibroblast	NA	aging	interferon signaling/response	Inflammation	up	in vitro	mouse	WT	bulk RNA-seq	GSE247199	untreated	untreated	4m	20m	NA	NA	NA	NA	figure 3d	38517750	NA
Mitchell et al	NA	skin	fibroblast	NA	aging	inflammatory response	Inflammation	up	in vitro	mouse	WT	bulk RNA-seq	GSE247199	untreated	untreated	4m	20m	NA	NA	NA	NA	figure 3d	38517750	NA
Mitchell et al	NA	skin	fibroblast	NA	aging	interferon signaling/response	Inflammation	up	in vitro	mouse	WT	proteomics	GSE247199	untreated	untreated	4m	20m	NA	NA	NA	NA	figure 3d	38517750	NA
Mitchell et al	NA	skin	fibroblast	NA	aging	inflammatory response	Inflammation	up	in vitro	mouse	WT	proteomics	GSE247199	untreated	untreated	4m	20m	NA	NA	NA	NA	figure 3d	38517750	NA
Mitchell et al	NA	skin	fibroblast	NA	aging	EMT	EMT	up	in vitro	mouse	WT	bulk RNA-seq	GSE247199	untreated	untreated	4m	20m	NA	NA	NA	NA	figure 3d	38517750	NA
Mitchell et al	NA	skin	fibroblast	NA	reprogramming	ECM organization	ECM	down	in vitro	mouse	WT	proteomics	GSE247199	untreated	treated	4m	4m	NA	chemical[2c]	NA	2c: repsox, trans-2-phenylcyclopropylamine[6d]	figure 3d	38517750	chemical
Mitchell et al	NA	skin	fibroblast	NA	reprogramming	ECM organization	ECM	down	in vitro	mouse	WT	proteomics	GSE247199	untreated	treated	20m	20m	NA	chemical[2c]	NA	2c: repsox, trans-2-phenylcyclopropylamine[6d]	figure 3d	38517750	chemical
Mitchell et al	NA	skin	fibroblast	NA	reprogramming	ECM organization	ECM	down	in vitro	mouse	WT	proteomics	GSE247199	untreated	treated	4m	4m	NA	chemical[7c]	NA	7c: repsox, trans-2-phenylcyclopropylamine, DZNep, TTNPB, CHIR99021, forskolin, and valproic acid[6d]	figure 3d	38517750	chemical
Mitchell et al	NA	skin	fibroblast	NA	reprogramming	ECM organization	ECM	down	in vitro	mouse	WT	proteomics	GSE247199	untreated	treated	20m	20m	NA	chemical[7c]	NA	7c: repsox, trans-2-phenylcyclopropylamine, DZNep, TTNPB, CHIR99021, forskolin, and valproic acid[6d]	figure 3d	38517750	chemical
Mitchell et al	NA	skin	fibroblast	NA	reprogramming	EMT	EMT	down	in vitro	mouse	WT	proteomics	GSE247199	untreated	treated	4m	4m	NA	chemical[2c]	NA	2c: repsox, trans-2-phenylcyclopropylamine[6d]	figure 3d	38517750	chemical
Mitchell et al	NA	skin	fibroblast	NA	reprogramming	EMT	EMT	down	in vitro	mouse	WT	proteomics	GSE247199	untreated	treated	20m	20m	NA	chemical[2c]	NA	2c: repsox, trans-2-phenylcyclopropylamine[6d]	figure 3d	38517750	chemical
Mitchell et al	NA	skin	fibroblast	NA	reprogramming	EMT	EMT	down	in vitro	mouse	WT	proteomics	GSE247199	untreated	treated	4m	4m	NA	chemical[7c]	NA	7c: repsox, trans-2-phenylcyclopropylamine, DZNep, TTNPB, CHIR99021, forskolin, and valproic acid[6d]	figure 3d	38517750	chemical
Mitchell et al	NA	skin	fibroblast	NA	reprogramming	fatty acid metabolism	Energetics	up	in vitro	mouse	WT	proteomics	GSE247199	untreated	treated	4m	4m	NA	chemical[2c]	NA	2c: repsox, trans-2-phenylcyclopropylamine[6d]	figure 3d	38517750	chemical
Mitchell et al	NA	skin	fibroblast	NA	reprogramming	fatty acid metabolism	Energetics	up	in vitro	mouse	WT	proteomics	GSE247199	untreated	treated	20m	20m	NA	chemical[2c]	NA	2c: repsox, trans-2-phenylcyclopropylamine[6d]	figure 3d	38517750	chemical
Mitchell et al	NA	skin	fibroblast	NA	reprogramming	fatty acid metabolism	Energetics	up	in vitro	mouse	WT	bulk RNA-seq	GSE247199	untreated	treated	4m	4m	NA	chemical[2c]	NA	2c: repsox, trans-2-phenylcyclopropylamine[6d]	figure 3d	38517750	chemical
Mitchell et al	NA	skin	fibroblast	NA	reprogramming	fatty acid metabolism	Energetics	up	in vitro	mouse	WT	bulk RNA-seq	GSE247199	untreated	treated	20m	20m	NA	chemical[2c]	NA	2c: repsox, trans-2-phenylcyclopropylamine[6d]	figure 3d	38517750	chemical
Mitchell et al	NA	skin	fibroblast	NA	reprogramming	fatty acid metabolism	Energetics	up	in vitro	mouse	WT	proteomics	GSE247199	untreated	treated	4m	4m	NA	chemical[7c]	NA	7c: repsox, trans-2-phenylcyclopropylamine, DZNep, TTNPB, CHIR99021, forskolin, and valproic acid[6d]	figure 3d	38517750	chemical
Mitchell et al	NA	skin	fibroblast	NA	reprogramming	fatty acid metabolism	Energetics	up	in vitro	mouse	WT	proteomics	GSE247199	untreated	treated	20m	20m	NA	chemical[7c]	NA	7c: repsox, trans-2-phenylcyclopropylamine, DZNep, TTNPB, CHIR99021, forskolin, and valproic acid[6d]	figure 3d	38517750	chemical
Mitchell et al	NA	skin	fibroblast	NA	reprogramming	inflammatory response	Inflammation	down	in vitro	mouse	WT	proteomics	GSE247199	untreated	treated	4m	4m	NA	chemical[2c]	NA	2c: repsox, trans-2-phenylcyclopropylamine[6d]	figure 3d	38517750	chemical
Mitchell et al	NA	skin	fibroblast	NA	reprogramming	inflammatory response	Inflammation	down	in vitro	mouse	WT	proteomics	GSE247199	untreated	treated	20m	20m	NA	chemical[2c]	NA	2c: repsox, trans-2-phenylcyclopropylamine[6d]	figure 3d	38517750	chemical
Mitchell et al	NA	skin	fibroblast	NA	reprogramming	inflammatory response	Inflammation	down	in vitro	mouse	WT	bulk RNA-seq	GSE247199	untreated	treated	4m	4m	NA	chemical[2c]	NA	2c: repsox, trans-2-phenylcyclopropylamine[6d]	figure 3d	38517750	chemical
Mitchell et al	NA	skin	fibroblast	NA	reprogramming	inflammatory response	Inflammation	down	in vitro	mouse	WT	bulk RNA-seq	GSE247199	untreated	treated	20m	20m	NA	chemical[2c]	NA	2c: repsox, trans-2-phenylcyclopropylamine[6d]	figure 3d	38517750	chemical
Mitchell et al	NA	skin	fibroblast	NA	reprogramming	interferon signaling/response	Inflammation	down	in vitro	mouse	WT	proteomics	GSE247199	untreated	treated	4m	4m	NA	chemical[2c]	NA	2c: repsox, trans-2-phenylcyclopropylamine[6d]	figure 3d	38517750	chemical
Mitchell et al	NA	skin	fibroblast	NA	reprogramming	interferon signaling/response	Inflammation	down	in vitro	mouse	WT	proteomics	GSE247199	untreated	treated	20m	20m	NA	chemical[2c]	NA	2c: repsox, trans-2-phenylcyclopropylamine[6d]	figure 3d	38517750	chemical
Mitchell et al	NA	skin	fibroblast	NA	reprogramming	interferon signaling/response	Inflammation	down	in vitro	mouse	WT	bulk RNA-seq	GSE247199	untreated	treated	4m	4m	NA	chemical[2c]	NA	2c: repsox, trans-2-phenylcyclopropylamine[6d]	figure 3d	38517750	chemical
Mitchell et al	NA	skin	fibroblast	NA	reprogramming	interferon signaling/response	Inflammation	down	in vitro	mouse	WT	bulk RNA-seq	GSE247199	untreated	treated	20m	20m	NA	chemical[2c]	NA	2c: repsox, trans-2-phenylcyclopropylamine[6d]	figure 3d	38517750	chemical
Mitchell et al	NA	skin	fibroblast	NA	reprogramming	interferon signaling/response	Inflammation	down	in vitro	mouse	WT	proteomics	GSE247199	untreated	treated	4m	4m	NA	chemical[7c]	NA	7c: repsox, trans-2-phenylcyclopropylamine, DZNep, TTNPB, CHIR99021, forskolin, and valproic acid[6d]	figure 3d	38517750	chemical
Mitchell et al	NA	skin	fibroblast	NA	reprogramming	interferon signaling/response	Inflammation	down	in vitro	mouse	WT	proteomics	GSE247199	untreated	treated	20m	20m	NA	chemical[7c]	NA	7c: repsox, trans-2-phenylcyclopropylamine, DZNep, TTNPB, CHIR99021, forskolin, and valproic acid[6d]	figure 3d	38517750	chemical
Mitchell et al	NA	skin	fibroblast	NA	reprogramming	interferon signaling/response	Inflammation	down	in vitro	mouse	WT	bulk RNA-seq	GSE247199	untreated	treated	4m	4m	NA	chemical[7c]	NA	7c: repsox, trans-2-phenylcyclopropylamine, DZNep, TTNPB, CHIR99021, forskolin, and valproic acid[6d]	figure 3d	38517750	chemical
Mitchell et al	NA	skin	fibroblast	NA	reprogramming	interferon signaling/response	Inflammation	down	in vitro	mouse	WT	bulk RNA-seq	GSE247199	untreated	treated	20m	20m	NA	chemical[7c]	NA	7c: repsox, trans-2-phenylcyclopropylamine, DZNep, TTNPB, CHIR99021, forskolin, and valproic acid[6d]	figure 3d	38517750	chemical
Mitchell et al	NA	skin	fibroblast	NA	reprogramming	mtor signaling	mTOR	down	in vitro	mouse	WT	proteomics	GSE247199	untreated	treated	4m	4m	NA	chemical[7c]	NA	7c: repsox, trans-2-phenylcyclopropylamine, DZNep, TTNPB, CHIR99021, forskolin, and valproic acid[6d]	figure 3d	38517750	chemical
Mitchell et al	NA	skin	fibroblast	NA	reprogramming	oxidative phosphorylation	Energetics	up	in vitro	mouse	WT	proteomics	GSE247199	untreated	treated	4m	4m	NA	chemical[2c]	NA	2c: repsox, trans-2-phenylcyclopropylamine[6d]	figure 3d	38517750	chemical
Mitchell et al	NA	skin	fibroblast	NA	reprogramming	oxidative phosphorylation	Energetics	up	in vitro	mouse	WT	proteomics	GSE247199	untreated	treated	20m	20m	NA	chemical[2c]	NA	2c: repsox, trans-2-phenylcyclopropylamine[6d]	figure 3d	38517750	chemical
Mitchell et al	NA	skin	fibroblast	NA	reprogramming	oxidative phosphorylation	Energetics	up	in vitro	mouse	WT	bulk RNA-seq	GSE247199	untreated	treated	4m	4m	NA	chemical[2c]	NA	2c: repsox, trans-2-phenylcyclopropylamine[6d]	figure 3d	38517750	chemical
Mitchell et al	NA	skin	fibroblast	NA	reprogramming	oxidative phosphorylation	Energetics	up	in vitro	mouse	WT	bulk RNA-seq	GSE247199	untreated	treated	20m	20m	NA	chemical[2c]	NA	2c: repsox, trans-2-phenylcyclopropylamine[6d]	figure 3d	38517750	chemical
Mitchell et al	NA	skin	fibroblast	NA	reprogramming	oxidative phosphorylation	Energetics	up	in vitro	mouse	WT	proteomics	GSE247199	untreated	treated	4m	4m	NA	chemical[7c]	NA	7c: repsox, trans-2-phenylcyclopropylamine, DZNep, TTNPB, CHIR99021, forskolin, and valproic acid[6d]	figure 3d	38517750	chemical
Mitchell et al	NA	skin	fibroblast	NA	reprogramming	oxidative phosphorylation	Energetics	up	in vitro	mouse	WT	proteomics	GSE247199	untreated	treated	20m	20m	NA	chemical[7c]	NA	7c: repsox, trans-2-phenylcyclopropylamine, DZNep, TTNPB, CHIR99021, forskolin, and valproic acid[6d]	figure 3d	38517750	chemical
Mitchell et al	NA	skin	fibroblast	NA	reprogramming	oxidative phosphorylation	Energetics	up	in vitro	mouse	WT	bulk RNA-seq	GSE247199	untreated	treated	20m	20m	NA	chemical[7c]	NA	7c: repsox, trans-2-phenylcyclopropylamine, DZNep, TTNPB, CHIR99021, forskolin, and valproic acid[6d]	figure 3d	38517750	chemical
Mitchell et al	NA	skin	fibroblast	NA	reprogramming	p53 signaling	p53	up	in vitro	mouse	WT	proteomics	GSE247199	untreated	treated	4m	4m	NA	chemical[2c]	NA	2c: repsox, trans-2-phenylcyclopropylamine[6d]	figure 3d	38517750	chemical
Mitchell et al	NA	skin	fibroblast	NA	reprogramming	p53 signaling	p53	up	in vitro	mouse	WT	proteomics	GSE247199	untreated	treated	20m	20m	NA	chemical[2c]	NA	2c: repsox, trans-2-phenylcyclopropylamine[6d]	figure 3d	38517750	chemical
Mitchell et al	NA	skin	fibroblast	NA	reprogramming	p53 signaling	p53	up	in vitro	mouse	WT	proteomics	GSE247199	untreated	treated	4m	4m	NA	chemical[7c]	NA	7c: repsox, trans-2-phenylcyclopropylamine, DZNep, TTNPB, CHIR99021, forskolin, and valproic acid[6d]	figure 3d	38517750	chemical
Mitchell et al	NA	skin	fibroblast	NA	reprogramming	p53 signaling	p53	up	in vitro	mouse	WT	proteomics	GSE247199	untreated	treated	20m	20m	NA	chemical[7c]	NA	7c: repsox, trans-2-phenylcyclopropylamine, DZNep, TTNPB, CHIR99021, forskolin, and valproic acid[6d]	figure 3d	38517750	chemical
Mitchell et al	NA	skin	fibroblast	NA	reprogramming	PI3K AKT mTOR signaling	mTOR	down	in vitro	mouse	WT	proteomics	GSE247199	untreated	treated	20m	20m	NA	chemical[7c]	NA	7c: repsox, trans-2-phenylcyclopropylamine, DZNep, TTNPB, CHIR99021, forskolin, and valproic acid[6d]	figure 3d	38517750	chemical
Mitchell et al	NA	skin	fibroblast	NA	reprogramming	TCA cycle	Energetics	up	in vitro	mouse	WT	proteomics	GSE247199	untreated	treated	4m	4m	NA	chemical[2c]	NA	2c: repsox, trans-2-phenylcyclopropylamine[6d]	figure 3d	38517750	chemical
Mitchell et al	NA	skin	fibroblast	NA	reprogramming	TCA cycle	Energetics	up	in vitro	mouse	WT	proteomics	GSE247199	untreated	treated	20m	20m	NA	chemical[2c]	NA	2c: repsox, trans-2-phenylcyclopropylamine[6d]	figure 3d	38517750	chemical
Mitchell et al	NA	skin	fibroblast	NA	reprogramming	TCA cycle	Energetics	up	in vitro	mouse	WT	bulk RNA-seq	GSE247199	untreated	treated	4m	4m	NA	chemical[2c]	NA	2c: repsox, trans-2-phenylcyclopropylamine[6d]	figure 3d	38517750	chemical
Mitchell et al	NA	skin	fibroblast	NA	reprogramming	TCA cycle	Energetics	up	in vitro	mouse	WT	proteomics	GSE247199	untreated	treated	4m	4m	NA	chemical[7c]	NA	7c: repsox, trans-2-phenylcyclopropylamine, DZNep, TTNPB, CHIR99021, forskolin, and valproic acid[6d]	figure 3d	38517750	chemical
Mitchell et al	NA	skin	fibroblast	NA	reprogramming	TCA cycle	Energetics	up	in vitro	mouse	WT	proteomics	GSE247199	untreated	treated	20m	20m	NA	chemical[7c]	NA	7c: repsox, trans-2-phenylcyclopropylamine, DZNep, TTNPB, CHIR99021, forskolin, and valproic acid[6d]	figure 3d	38517750	chemical
Mitchell et al	NA	skin	fibroblast	NA	reprogramming	mitochondrial oxidative phosphorylation complexes	Energetics	up	in vitro	mouse	WT	bulk RNA-seq	GSE247199	untreated	treated	20m	20m	NA	chemical[7c]	NA	7c: repsox, trans-2-phenylcyclopropylamine, DZNep, TTNPB, CHIR99021, forskolin, and valproic acid[6d]	figure 3e	38517750	chemical
Mitchell et al	NA	skin	fibroblast	NA	reprogramming	mitochondrial oxidative phosphorylation complexes	Energetics	up	in vitro	mouse	WT	bulk RNA-seq	GSE247199	untreated	treated	20m	20m	NA	chemical[2c]	NA	2c: repsox, trans-2-phenylcyclopropylamine[6d]	figure 3e	38517750	chemical
Mitchell et al	NA	skin	fibroblast	NA	aging	chronological multi-tissue mouse transcriptomic clock	Aging	up	in vitro	mouse	WT	bulk RNA-seq	GSE247199	untreated	untreated	4m	20m	NA	NA	NA	NA	figure 7a	38517750	NA
Mitchell et al	NA	skin	fibroblast	NA	aging	chronological multi-tissue mouse transcriptomic clock	Aging	down	in vitro	mouse	WT	bulk RNA-seq	GSE247199	untreated	treated	4m	4m	NA	chemical[2c]	NA	2c: repsox, trans-2-phenylcyclopropylamine[6d]	figure 7a	38517750	chemical
Mitchell et al	NA	skin	fibroblast	NA	aging	chronological multi-tissue mouse transcriptomic clock	Aging	down	in vitro	mouse	WT	bulk RNA-seq	GSE247199	untreated	treated	4m	4m	NA	chemical[7c]	NA	7c: repsox, trans-2-phenylcyclopropylamine, DZNep, TTNPB, CHIR99021, forskolin, and valproic acid[6d]	figure 7a	38517750	chemical
Mitchell et al	NA	skin	fibroblast	NA	aging	chronological multi-tissue mouse transcriptomic clock	Aging	no change	in vitro	mouse	WT	bulk RNA-seq	GSE247199	untreated	treated	20m	20m	NA	chemical[2c]	NA	2c: repsox, trans-2-phenylcyclopropylamine[6d]	figure 7a	38517750	chemical
Mitchell et al	NA	skin	fibroblast	NA	aging	chronological multi-tissue mouse transcriptomic clock	Aging	down	in vitro	mouse	WT	bulk RNA-seq	GSE247199	untreated	treated	20m	20m	NA	chemical[7c]	NA	7c: repsox, trans-2-phenylcyclopropylamine, DZNep, TTNPB, CHIR99021, forskolin, and valproic acid[6d]	figure 7a	38517750	chemical
Mitchell et al	NA	skin	fibroblast	NA	aging	biological multi-tissue mouse transcriptomic clock	Aging	no change	in vitro	mouse	WT	bulk RNA-seq	GSE247199	untreated	untreated	4m	20m	NA	NA	NA	NA	figure 7a	38517750	NA
Mitchell et al	NA	skin	fibroblast	NA	aging	biological multi-tissue mouse transcriptomic clock	Aging	no change	in vitro	mouse	WT	bulk RNA-seq	GSE247199	untreated	treated	4m	4m	NA	chemical[2c]	NA	2c: repsox, trans-2-phenylcyclopropylamine[6d]	figure 7a	38517750	chemical
Mitchell et al	NA	skin	fibroblast	NA	aging	biological multi-tissue mouse transcriptomic clock	Aging	down	in vitro	mouse	WT	bulk RNA-seq	GSE247199	untreated	treated	4m	4m	NA	chemical[7c]	NA	7c: repsox, trans-2-phenylcyclopropylamine, DZNep, TTNPB, CHIR99021, forskolin, and valproic acid[6d]	figure 7a	38517750	chemical
Mitchell et al	NA	skin	fibroblast	NA	aging	biological multi-tissue mouse transcriptomic clock	Aging	no change	in vitro	mouse	WT	bulk RNA-seq	GSE247199	untreated	treated	20m	20m	NA	chemical[2c]	NA	2c: repsox, trans-2-phenylcyclopropylamine[6d]	figure 7a	38517750	chemical
Mitchell et al	NA	skin	fibroblast	NA	aging	biological multi-tissue mouse transcriptomic clock	Aging	down	in vitro	mouse	WT	bulk RNA-seq	GSE247199	untreated	treated	20m	20m	NA	chemical[7c]	NA	7c: repsox, trans-2-phenylcyclopropylamine, DZNep, TTNPB, CHIR99021, forskolin, and valproic acid[6d]	figure 7a	38517750	chemical
Mitchell et al	NA	skin	fibroblast	NA	aging	UniversalClock2 clock	Aging	up	in vitro	mouse	WT	methylation array	GSE247199	untreated	untreated	4m	20m	NA	NA	NA	NA	figure 7b	38517750	NA
Mitchell et al	NA	skin	fibroblast	NA	reprogramming	UniversalClock2 clock	Aging	no change	in vitro	mouse	WT	methylation array	GSE247199	untreated	treated	4m	4m	NA	chemical[2c]	NA	2c: repsox, trans-2-phenylcyclopropylamine[6d]	figure 7b	38517750	chemical
Mitchell et al	NA	skin	fibroblast	NA	reprogramming	UniversalClock2 clock	Aging	down	in vitro	mouse	WT	methylation array	GSE247199	untreated	treated	4m	4m	NA	chemical[7c]	NA	7c: repsox, trans-2-phenylcyclopropylamine, DZNep, TTNPB, CHIR99021, forskolin, and valproic acid[6d]	figure 7b	38517750	chemical
Mitchell et al	NA	skin	fibroblast	NA	reprogramming	UniversalClock2 clock	Aging	no change	in vitro	mouse	WT	methylation array	GSE247199	untreated	treated	20m	20m	NA	chemical[2c]	NA	2c: repsox, trans-2-phenylcyclopropylamine[6d]	figure 7b	38517750	chemical
Mitchell et al	NA	skin	fibroblast	NA	reprogramming	UniversalClock2 clock	Aging	down	in vitro	mouse	WT	methylation array	GSE247199	untreated	treated	20m	20m	NA	chemical[7c]	NA	7c: repsox, trans-2-phenylcyclopropylamine, DZNep, TTNPB, CHIR99021, forskolin, and valproic acid[6d]	figure 7b	38517750	chemical
Mitchell et al	NA	skin	fibroblast	NA	aging	UniversalClock3 clock	Aging	up	in vitro	mouse	WT	methylation array	GSE247199	untreated	untreated	4m	20m	NA	NA	NA	NA	figure 7b	38517750	NA
Mitchell et al	NA	skin	fibroblast	NA	reprogramming	UniversalClock3 clock	Aging	no change	in vitro	mouse	WT	methylation array	GSE247199	untreated	treated	4m	4m	NA	chemical[2c]	NA	2c: repsox, trans-2-phenylcyclopropylamine[6d]	figure 7b	38517750	chemical
Mitchell et al	NA	skin	fibroblast	NA	reprogramming	UniversalClock3 clock	Aging	down	in vitro	mouse	WT	methylation array	GSE247199	untreated	treated	4m	4m	NA	chemical[7c]	NA	7c: repsox, trans-2-phenylcyclopropylamine, DZNep, TTNPB, CHIR99021, forskolin, and valproic acid[6d]	figure 7b	38517750	chemical
Mitchell et al	NA	skin	fibroblast	NA	reprogramming	UniversalClock3 clock	Aging	no change	in vitro	mouse	WT	methylation array	GSE247199	untreated	treated	20m	20m	NA	chemical[2c]	NA	2c: repsox, trans-2-phenylcyclopropylamine[6d]	figure 7b	38517750	chemical
Mitchell et al	NA	skin	fibroblast	NA	reprogramming	UniversalClock3 clock	Aging	down	in vitro	mouse	WT	methylation array	GSE247199	untreated	treated	20m	20m	NA	chemical[7c]	NA	7c: repsox, trans-2-phenylcyclopropylamine, DZNep, TTNPB, CHIR99021, forskolin, and valproic acid[6d]	figure 7b	38517750	chemical
Mitchell et al	NA	skin	fibroblast	NA	aging	Pan clock	Aging	up	in vitro	mouse	WT	methylation array	GSE247199	untreated	untreated	4m	20m	NA	NA	NA	NA	figure 7b	38517750	NA
Mitchell et al	NA	skin	fibroblast	NA	reprogramming	Pan clock	Aging	no change	in vitro	mouse	WT	methylation array	GSE247199	untreated	treated	4m	4m	NA	chemical[2c]	NA	2c: repsox, trans-2-phenylcyclopropylamine[6d]	figure 7b	38517750	chemical
Mitchell et al	NA	skin	fibroblast	NA	reprogramming	Pan clock	Aging	down	in vitro	mouse	WT	methylation array	GSE247199	untreated	treated	4m	4m	NA	chemical[7c]	NA	7c: repsox, trans-2-phenylcyclopropylamine, DZNep, TTNPB, CHIR99021, forskolin, and valproic acid[6d]	figure 7b	38517750	chemical
Mitchell et al	NA	skin	fibroblast	NA	reprogramming	Pan clock	Aging	no change	in vitro	mouse	WT	methylation array	GSE247199	untreated	treated	20m	20m	NA	chemical[2c]	NA	2c: repsox, trans-2-phenylcyclopropylamine[6d]	figure 7b	38517750	chemical
Mitchell et al	NA	skin	fibroblast	NA	reprogramming	Pan clock	Aging	down	in vitro	mouse	WT	methylation array	GSE247199	untreated	treated	20m	20m	NA	chemical[7c]	NA	7c: repsox, trans-2-phenylcyclopropylamine, DZNep, TTNPB, CHIR99021, forskolin, and valproic acid[6d]	figure 7b	38517750	chemical
Mitchell et al	NA	skin	fibroblast	NA	aging	Fibroblast clock	Aging	up	in vitro	mouse	WT	methylation array	GSE247199	untreated	untreated	4m	20m	NA	NA	NA	NA	figure 7b	38517750	NA
Mitchell et al	NA	skin	fibroblast	NA	reprogramming	Fibroblast clock	Aging	down	in vitro	mouse	WT	methylation array	GSE247199	untreated	treated	4m	4m	NA	chemical[2c]	NA	2c: repsox, trans-2-phenylcyclopropylamine[6d]	figure 7b	38517750	chemical
Mitchell et al	NA	skin	fibroblast	NA	reprogramming	Fibroblast clock	Aging	down	in vitro	mouse	WT	methylation array	GSE247199	untreated	treated	4m	4m	NA	chemical[7c]	NA	7c: repsox, trans-2-phenylcyclopropylamine, DZNep, TTNPB, CHIR99021, forskolin, and valproic acid[6d]	figure 7b	38517750	chemical
Mitchell et al	NA	skin	fibroblast	NA	reprogramming	Fibroblast clock	Aging	no change	in vitro	mouse	WT	methylation array	GSE247199	untreated	treated	20m	20m	NA	chemical[2c]	NA	2c: repsox, trans-2-phenylcyclopropylamine[6d]	figure 7b	38517750	chemical
Mitchell et al	NA	skin	fibroblast	NA	reprogramming	Fibroblast clock	Aging	down	in vitro	mouse	WT	methylation array	GSE247199	untreated	treated	20m	20m	NA	chemical[7c]	NA	7c: repsox, trans-2-phenylcyclopropylamine, DZNep, TTNPB, CHIR99021, forskolin, and valproic acid[6d]	figure 7b	38517750	chemical
Mitchell et al	NA	skin	fibroblast	NA	aging	FibroblastInterventions clock	Aging	up	in vitro	mouse	WT	methylation array	GSE247199	untreated	untreated	4m	20m	NA	NA	NA	NA	figure 7b	38517750	NA
Mitchell et al	NA	skin	fibroblast	NA	reprogramming	FibroblastInterventions clock	Aging	no change	in vitro	mouse	WT	methylation array	GSE247199	untreated	treated	4m	4m	NA	chemical[2c]	NA	2c: repsox, trans-2-phenylcyclopropylamine[6d]	figure 7b	38517750	chemical
Mitchell et al	NA	skin	fibroblast	NA	reprogramming	FibroblastInterventions clock	Aging	down	in vitro	mouse	WT	methylation array	GSE247199	untreated	treated	4m	4m	NA	chemical[7c]	NA	7c: repsox, trans-2-phenylcyclopropylamine, DZNep, TTNPB, CHIR99021, forskolin, and valproic acid[6d]	figure 7b	38517750	chemical
Mitchell et al	NA	skin	fibroblast	NA	reprogramming	FibroblastInterventions clock	Aging	no change	in vitro	mouse	WT	methylation array	GSE247199	untreated	treated	20m	20m	NA	chemical[2c]	NA	2c: repsox, trans-2-phenylcyclopropylamine[6d]	figure 7b	38517750	chemical
Mitchell et al	NA	skin	fibroblast	NA	reprogramming	FibroblastInterventions clock	Aging	down	in vitro	mouse	WT	methylation array	GSE247199	untreated	treated	20m	20m	NA	chemical[7c]	NA	7c: repsox, trans-2-phenylcyclopropylamine, DZNep, TTNPB, CHIR99021, forskolin, and valproic acid[6d]	figure 7b	38517750	chemical
Mitchell et al	NA	skin	fibroblast	NA	aging	FibroblastDevelopment clock	Aging	no change	in vitro	mouse	WT	methylation array	GSE247199	untreated	untreated	4m	20m	NA	NA	NA	NA	figure 7b	38517750	NA
Mitchell et al	NA	skin	fibroblast	NA	reprogramming	FibroblastDevelopment clock	Aging	no change	in vitro	mouse	WT	methylation array	GSE247199	untreated	treated	4m	4m	NA	chemical[2c]	NA	2c: repsox, trans-2-phenylcyclopropylamine[6d]	figure 7b	38517750	chemical
Mitchell et al	NA	skin	fibroblast	NA	reprogramming	FibroblastDevelopment clock	Aging	down	in vitro	mouse	WT	methylation array	GSE247199	untreated	treated	4m	4m	NA	chemical[7c]	NA	7c: repsox, trans-2-phenylcyclopropylamine, DZNep, TTNPB, CHIR99021, forskolin, and valproic acid[6d]	figure 7b	38517750	chemical
Mitchell et al	NA	skin	fibroblast	NA	reprogramming	FibroblastDevelopment clock	Aging	up	in vitro	mouse	WT	methylation array	GSE247199	untreated	treated	20m	20m	NA	chemical[2c]	NA	2c: repsox, trans-2-phenylcyclopropylamine[6d]	figure 7b	38517750	chemical
Mitchell et al	NA	skin	fibroblast	NA	reprogramming	FibroblastDevelopment clock	Aging	down	in vitro	mouse	WT	methylation array	GSE247199	untreated	treated	20m	20m	NA	chemical[7c]	NA	7c: repsox, trans-2-phenylcyclopropylamine, DZNep, TTNPB, CHIR99021, forskolin, and valproic acid[6d]	figure 7b	38517750	chemical
Olova et al	NA	skin	fibroblast	dermal fibroblast	reprogramming	early pluripotency markers	Development/Differentiation	up	in vitro	human	WT	gene expression microarray	GSE54848	untreated	treated[d11]	NA	NA	NA	OSKM[11d]	0d	NA	figure 1a	30450724	OSKM
Olova et al	NA	skin	fibroblast	dermal fibroblast	reprogramming	late pluripotency markers	Development/Differentiation	up	in vitro	human	WT	gene expression microarray	GSE54848	untreated	treated[d20]	NA	NA	NA	OSKM[20d]	0d	NA	figure 1a	30450724	OSKM
Olova et al	NA	skin	fibroblast	dermal fibroblast	reprogramming	embryonic development genes	Development/Differentiation	up	in vitro	human	WT	gene expression microarray	GSE54848	untreated	treated[d20]	NA	NA	NA	OSKM[20d]	0d	NA	figure s4	30450724	OSKM
Olova et al	NA	skin	fibroblast	dermal fibroblast	reprogramming	fibroblast markers	Development/Differentiation	down	in vitro	human	WT	gene expression microarray	GSE54848	untreated	treated[d35]	NA	NA	NA	OSKM[35d]	0d	NA	figure 1b	30450724	OSKM
Olova et al	NA	skin	fibroblast	dermal fibroblast	reprogramming	embryonic developmental genes	Development/Differentiation	down	in vitro	human	WT	gene expression microarray	GSE54848	treated[d20]	treated[d49]	NA	NA	OSKM[20d]	OSKM[49d]	0d	NA	figure s4	30450724	OSKM
Olova et al	NA	skin	fibroblast	dermal fibroblast	reprogramming	Weidner 99 CpG blood-based epigenetic clock	Aging	down	in vitro	human	WT	methylation array	GSE54848	untreated	treated[d20]	NA	NA	NA	OSKM[20d]	0d	NA	figure s2a	30450724	OSKM
Olova et al	NA	skin	fibroblast	dermal fibroblast	reprogramming	Skin & blood clock	Aging	down	in vitro	human	WT	methylation array	GSE54848	untreated	treated[d20]	NA	NA	NA	OSKM[20d]	0d	NA	figure s2b	30450724	OSKM
Olova et al	NA	skin	fibroblast	dermal fibroblast	reprogramming	PhenoAge clock	Aging	down	in vitro	human	WT	methylation array	GSE54848	untreated	treated[d20]	NA	NA	NA	OSKM[20d]	0d	NA	figure s2c	30450724	OSKM
Olova et al	NA	skin	fibroblast	dermal fibroblast	reprogramming	Hannum blood-based epigenetic clock	Aging	down	in vitro	human	WT	methylation array	GSE54848	untreated	treated[d20]	NA	NA	NA	OSKM[20d]	0d	NA	figure s2d	30450724	OSKM
Olova et al	NA	skin	fibroblast	dermal fibroblast	reprogramming	Weidner 3 CpG blood-based epigenetic clock	Aging	no change	in vitro	human	WT	methylation array	GSE54848	untreated	treated[d20]	NA	NA	NA	OSKM[20d]	0d	NA	figure s2e	30450724	OSKM
Paine et al	NA	skin	fibroblast	tail tip fibroblast	reprogramming	DNA repair	DNA Repair	up	in vitro	mouse	progeric	bulk RNA-seq	GSE231853	untreated	treated	2m	2m	NA	OSKM[2d]	NA	NA	figure 3d	38322248	OSKM
Paine et al	NA	skin	fibroblast	tail tip fibroblast	reprogramming	DNA repair	DNA Repair	down	in vitro	mouse	progeric	bulk RNA-seq	GSE231853	treated	treated	2m	2m	OSKM[2d]	OSKM[4d]	NA	NA	figure 3d	38322248	OSKM
Paine et al	NA	skin	fibroblast	tail tip fibroblast	reprogramming	DNA repair	DNA Repair	up	in vitro	mouse	progeric	bulk RNA-seq	GSE231853	untreated	treated	2m	2m	NA	OSKM[2d]	NA	NA	figure 3d	38322248	OSKM
Paine et al	NA	skin	fibroblast	tail tip fibroblast	reprogramming	DNA repair	DNA Repair	up	in vitro	mouse	progeric	bulk RNA-seq	GSE231853	treated	treated	2m	2m	OSKM+VC[2d]	OSKM+VC[4d]	NA	NA	figure 3d	38322248	OSKM
Paine et al	NA	skin	fibroblast	tail tip fibroblast	reprogramming	DNA repair	DNA Repair	up	in vitro	mouse	WT	bulk RNA-seq	GSE231853	untreated	treated	5.5m	5.5m	NA	OSKM[2d]	NA	NA	figure 3d	38322248	OSKM
Paine et al	NA	skin	fibroblast	tail tip fibroblast	reprogramming	DNA repair	DNA Repair	up	in vitro	mouse	WT	bulk RNA-seq	GSE231853	treated	treated	5.5m	5.5m	OSKM[2d]	OSKM[4d]	NA	NA	figure 3d	38322248	OSKM
Paine et al	NA	skin	fibroblast	tail tip fibroblast	reprogramming	DNA repair	DNA Repair	both	in vitro	mouse	WT	bulk RNA-seq	GSE231853	untreated	treated	5.5m	5.5m	NA	OSKM[2d]	NA	NA	figure 3d	38322248	OSKM
Paine et al	NA	skin	fibroblast	tail tip fibroblast	reprogramming	DNA repair	DNA Repair	up	in vitro	mouse	WT	bulk RNA-seq	GSE231853	treated	treated	5.5m	5.5m	OSKM+VC[2d]	OSKM+VC[4d]	NA	NA	figure 3d	38322248	OSKM
Paine et al	NA	skin	fibroblast	tail tip fibroblast	reprogramming	chromatin organization	Chromatin Organization	no change	in vitro	mouse	progeric	bulk RNA-seq	GSE231853	untreated	treated	2m	2m	NA	OSKM[2d]	NA	NA	figure 3d	38322248	OSKM
Paine et al	NA	skin	fibroblast	tail tip fibroblast	reprogramming	chromatin organization	Chromatin Organization	no change	in vitro	mouse	progeric	bulk RNA-seq	GSE231853	treated	treated	2m	2m	OSKM[2d]	OSKM[4d]	NA	NA	figure 3d	38322248	OSKM
Paine et al	NA	skin	fibroblast	tail tip fibroblast	reprogramming	chromatin organization	Chromatin Organization	up	in vitro	mouse	progeric	bulk RNA-seq	GSE231853	untreated	treated	2m	2m	NA	OSKM[2d]	NA	NA	figure 3d	38322248	OSKM
Paine et al	NA	skin	fibroblast	tail tip fibroblast	reprogramming	chromatin organization	Chromatin Organization	up	in vitro	mouse	progeric	bulk RNA-seq	GSE231853	treated	treated	2m	2m	OSKM+VC[2d]	OSKM+VC[4d]	NA	NA	figure 3d	38322248	OSKM
Paine et al	NA	skin	fibroblast	tail tip fibroblast	reprogramming	chromatin organization	Chromatin Organization	down	in vitro	mouse	WT	bulk RNA-seq	GSE231853	untreated	treated	5.5m	5.5m	NA	OSKM[2d]	NA	NA	figure 3d	38322248	OSKM
Paine et al	NA	skin	fibroblast	tail tip fibroblast	reprogramming	chromatin organization	Chromatin Organization	up	in vitro	mouse	WT	bulk RNA-seq	GSE231853	treated	treated	5.5m	5.5m	OSKM[2d]	OSKM[4d]	NA	NA	figure 3d	38322248	OSKM
Paine et al	NA	skin	fibroblast	tail tip fibroblast	reprogramming	chromatin organization	Chromatin Organization	up	in vitro	mouse	WT	bulk RNA-seq	GSE231853	untreated	treated	5.5m	5.5m	NA	OSKM[2d]	NA	NA	figure 3d	38322248	OSKM
Paine et al	NA	skin	fibroblast	tail tip fibroblast	reprogramming	chromatin organization	Chromatin Organization	up	in vitro	mouse	WT	bulk RNA-seq	GSE231853	treated	treated	5.5m	5.5m	OSKM+VC[2d]	OSKM+VC[4d]	NA	NA	figure 3d	38322248	OSKM
Paine et al	NA	skin	fibroblast	tail tip fibroblast	reprogramming	EMT	EMT	down	in vitro	mouse	progeric	bulk RNA-seq	GSE231853	untreated	treated	2m	2m	NA	OSKM[2d]	NA	NA	figure 3d	38322248	OSKM
Paine et al	NA	skin	fibroblast	tail tip fibroblast	reprogramming	EMT	EMT	down	in vitro	mouse	progeric	bulk RNA-seq	GSE231853	treated	treated	2m	2m	OSKM[2d]	OSKM[4d]	NA	NA	figure 3d	38322248	OSKM
Paine et al	NA	skin	fibroblast	tail tip fibroblast	reprogramming	EMT	EMT	down	in vitro	mouse	progeric	bulk RNA-seq	GSE231853	untreated	treated	2m	2m	NA	OSKM[2d]	NA	NA	figure 3d	38322248	OSKM
Paine et al	NA	skin	fibroblast	tail tip fibroblast	reprogramming	EMT	EMT	no change	in vitro	mouse	progeric	bulk RNA-seq	GSE231853	treated	treated	2m	2m	OSKM+VC[2d]	OSKM+VC[4d]	NA	NA	figure 3d	38322248	OSKM
Paine et al	NA	skin	fibroblast	tail tip fibroblast	reprogramming	EMT	EMT	down	in vitro	mouse	WT	bulk RNA-seq	GSE231853	untreated	treated	5.5m	5.5m	NA	OSKM[2d]	NA	NA	figure 3d	38322248	OSKM
Paine et al	NA	skin	fibroblast	tail tip fibroblast	reprogramming	EMT	EMT	up	in vitro	mouse	WT	bulk RNA-seq	GSE231853	treated	treated	5.5m	5.5m	OSKM[2d]	OSKM[4d]	NA	NA	figure 3d	38322248	OSKM
Paine et al	NA	skin	fibroblast	tail tip fibroblast	reprogramming	EMT	EMT	down	in vitro	mouse	WT	bulk RNA-seq	GSE231853	untreated	treated	5.5m	5.5m	NA	OSKM[2d]	NA	NA	figure 3d	38322248	OSKM
Paine et al	NA	skin	fibroblast	tail tip fibroblast	reprogramming	EMT	EMT	up	in vitro	mouse	WT	bulk RNA-seq	GSE231853	treated	treated	5.5m	5.5m	OSKM+VC[2d]	OSKM+VC[4d]	NA	NA	figure 3d	38322248	OSKM
Paine et al	NA	skin	fibroblast	tail tip fibroblast	reprogramming	TGFb receptor signaling	Inflammation	down	in vitro	mouse	progeric	bulk RNA-seq	GSE231853	untreated	treated	2m	2m	NA	OSKM[2d]	NA	NA	figure 3d	38322248	OSKM
Paine et al	NA	skin	fibroblast	tail tip fibroblast	reprogramming	TGFb receptor signaling	Inflammation	up	in vitro	mouse	progeric	bulk RNA-seq	GSE231853	treated	treated	2m	2m	OSKM[2d]	OSKM[4d]	NA	NA	figure 3d	38322248	OSKM
Paine et al	NA	skin	fibroblast	tail tip fibroblast	reprogramming	TGFb receptor signaling	Inflammation	down	in vitro	mouse	progeric	bulk RNA-seq	GSE231853	untreated	treated	2m	2m	NA	OSKM[2d]	NA	NA	figure 3d	38322248	OSKM
Paine et al	NA	skin	fibroblast	tail tip fibroblast	reprogramming	TGFb receptor signaling	Inflammation	no change	in vitro	mouse	progeric	bulk RNA-seq	GSE231853	treated	treated	2m	2m	OSKM+VC[2d]	OSKM+VC[4d]	NA	NA	figure 3d	38322248	OSKM
Paine et al	NA	skin	fibroblast	tail tip fibroblast	reprogramming	TGFb receptor signaling	Inflammation	down	in vitro	mouse	WT	bulk RNA-seq	GSE231853	untreated	treated	5.5m	5.5m	NA	OSKM[2d]	NA	NA	figure 3d	38322248	OSKM
Paine et al	NA	skin	fibroblast	tail tip fibroblast	reprogramming	TGFb receptor signaling	Inflammation	up	in vitro	mouse	WT	bulk RNA-seq	GSE231853	treated	treated	5.5m	5.5m	OSKM[2d]	OSKM[4d]	NA	NA	figure 3d	38322248	OSKM
Paine et al	NA	skin	fibroblast	tail tip fibroblast	reprogramming	TGFb receptor signaling	Inflammation	down	in vitro	mouse	WT	bulk RNA-seq	GSE231853	untreated	treated	5.5m	5.5m	NA	OSKM[2d]	NA	NA	figure 3d	38322248	OSKM
Paine et al	NA	skin	fibroblast	tail tip fibroblast	reprogramming	TGFb receptor signaling	Inflammation	down	in vitro	mouse	WT	bulk RNA-seq	GSE231853	treated	treated	5.5m	5.5m	OSKM+VC[2d]	OSKM+VC[4d]	NA	NA	figure 3d	38322248	OSKM
Paine et al	NA	skin	fibroblast	tail tip fibroblast	reprogramming	cornified envelope	Development/Differentiation	up	in vitro	mouse	progeric	bulk RNA-seq	GSE231853	untreated	treated	2m	2m	NA	OSKM[2d]	NA	NA	figure s3c	38322248	OSKM
Paine et al	NA	skin	fibroblast	tail tip fibroblast	reprogramming	cornified envelope	Development/Differentiation	up	in vitro	mouse	progeric	bulk RNA-seq	GSE231853	untreated	treated	2m	2m	NA	OSKM[4d]	NA	NA	figure s3c	38322248	OSKM
Paine et al	NA	skin	fibroblast	tail tip fibroblast	reprogramming	cornified envelope	Development/Differentiation	up	in vitro	mouse	progeric	bulk RNA-seq	GSE231853	untreated	treated	2m	2m	NA	OSKM+VC[2d]	NA	NA	figure s3c	38322248	OSKM
Paine et al	NA	skin	fibroblast	tail tip fibroblast	reprogramming	cornified envelope	Development/Differentiation	up	in vitro	mouse	progeric	bulk RNA-seq	GSE231853	untreated	treated	2m	2m	NA	OSKM+VC[4d]	NA	NA	figure s3c	38322248	OSKM
Paine et al	NA	skin	fibroblast	tail tip fibroblast	reprogramming	cornified envelope	Development/Differentiation	up	in vitro	mouse	WT	bulk RNA-seq	GSE231853	untreated	treated	5.5m	5.5m	NA	OSKM[4d]	NA	NA	figure s3c	38322248	OSKM
Paine et al	NA	skin	fibroblast	tail tip fibroblast	reprogramming	cornified envelope	Development/Differentiation	up	in vitro	mouse	WT	bulk RNA-seq	GSE231853	untreated	treated	5.5m	5.5m	NA	OSKM[2d]	NA	NA	figure s3c	38322248	OSKM
Paine et al	NA	skin	fibroblast	tail tip fibroblast	reprogramming	cornified envelope	Development/Differentiation	up	in vitro	mouse	WT	bulk RNA-seq	GSE231853	untreated	treated	5.5m	5.5m	NA	OSKM+VC[4d]	NA	NA	figure s3c	38322248	OSKM
Paine et al	NA	skin	fibroblast	tail tip fibroblast	reprogramming	cornified envelope	Development/Differentiation	up	in vitro	mouse	WT	bulk RNA-seq	GSE231853	untreated	treated	5.5m	5.5m	NA	OSKM+VC[2d]	NA	NA	figure s3c	38322248	OSKM
Paine et al	NA	skin	fibroblast	tail tip fibroblast	reprogramming	epidermal differentiation	Development/Differentiation	up	in vitro	mouse	progeric	bulk RNA-seq	GSE231853	untreated	treated	2m	2m	NA	OSKM[2d]	NA	NA	figure s3b	38322248	OSKM
Paine et al	NA	skin	fibroblast	tail tip fibroblast	reprogramming	epidermal differentiation	Development/Differentiation	up	in vitro	mouse	progeric	bulk RNA-seq	GSE231853	untreated	treated	2m	2m	NA	OSKM[4d]	NA	NA	figure s3b	38322248	OSKM
Paine et al	NA	skin	fibroblast	tail tip fibroblast	reprogramming	epidermal differentiation	Development/Differentiation	up	in vitro	mouse	progeric	bulk RNA-seq	GSE231853	untreated	treated	2m	2m	NA	OSKM+VC[2d]	NA	NA	figure s3b	38322248	OSKM
Paine et al	NA	skin	fibroblast	tail tip fibroblast	reprogramming	epidermal differentiation	Development/Differentiation	up	in vitro	mouse	progeric	bulk RNA-seq	GSE231853	untreated	treated	2m	2m	NA	OSKM+VC[4d]	NA	NA	figure s3b	38322248	OSKM
Paine et al	NA	skin	fibroblast	tail tip fibroblast	reprogramming	epidermal differentiation	Development/Differentiation	up	in vitro	mouse	WT	bulk RNA-seq	GSE231853	untreated	treated	5.5m	5.5m	NA	OSKM[4d]	NA	NA	figure s3b	38322248	OSKM
Paine et al	NA	skin	fibroblast	tail tip fibroblast	reprogramming	epidermal differentiation	Development/Differentiation	up	in vitro	mouse	WT	bulk RNA-seq	GSE231853	untreated	treated	5.5m	5.5m	NA	OSKM[2d]	NA	NA	figure s3b	38322248	OSKM
Paine et al	NA	skin	fibroblast	tail tip fibroblast	reprogramming	epidermal differentiation	Development/Differentiation	up	in vitro	mouse	WT	bulk RNA-seq	GSE231853	untreated	treated	5.5m	5.5m	NA	OSKM+VC[4d]	NA	NA	figure s3b	38322248	OSKM
Paine et al	NA	skin	fibroblast	tail tip fibroblast	reprogramming	epidermal differentiation	Development/Differentiation	up	in vitro	mouse	WT	bulk RNA-seq	GSE231853	untreated	treated	5.5m	5.5m	NA	OSKM+VC[2d]	NA	NA	figure s3b	38322248	OSKM
Paine et al	NA	skin	fibroblast	tail tip fibroblast	reprogramming	DNAm Age Skin Final clock	Aging	down	in vitro	mouse	progeric	methylation array	GSE231853	untreated	treated	2m	2m	NA	OSKM+VC[4d]	NA	NA	figure 2a	38322248	OSKM
Paine et al	NA	skin	fibroblast	tail tip fibroblast	reprogramming	intermediate filament cytoskeleton organization	Cytoskeletal	up	in vitro	mouse	progeric	bulk RNA-seq	GSE231853	untreated	treated	2m	2m	NA	OSKM[4d]	NA	NA	figure s3b	38322248	OSKM
Paine et al	NA	skin	fibroblast	tail tip fibroblast	reprogramming	intermediate filament cytoskeleton organization	Cytoskeletal	up	in vitro	mouse	progeric	bulk RNA-seq	GSE231853	untreated	treated	2m	2m	NA	OSKM[2d]	NA	NA	figure s3b	38322248	OSKM
Paine et al	NA	skin	fibroblast	tail tip fibroblast	reprogramming	intermediate filament cytoskeleton organization	Cytoskeletal	up	in vitro	mouse	progeric	bulk RNA-seq	GSE231853	untreated	treated	2m	2m	NA	OSKM+VC[2d]	NA	NA	figure s3b	38322248	OSKM
Paine et al	NA	skin	fibroblast	tail tip fibroblast	reprogramming	intermediate filament cytoskeleton organization	Cytoskeletal	up	in vitro	mouse	progeric	bulk RNA-seq	GSE231853	untreated	treated	2m	2m	NA	OSKM+VC[4d]	NA	NA	figure s3b	38322248	OSKM
Paine et al	NA	skin	fibroblast	tail tip fibroblast	reprogramming	intermediate filament cytoskeleton organization	Cytoskeletal	up	in vitro	mouse	WT	bulk RNA-seq	GSE231853	untreated	treated	5.5m	5.5m	NA	OSKM[2d]	NA	NA	figure s3b	38322248	OSKM
Paine et al	NA	skin	fibroblast	tail tip fibroblast	reprogramming	intermediate filament cytoskeleton organization	Cytoskeletal	up	in vitro	mouse	WT	bulk RNA-seq	GSE231853	untreated	treated	5.5m	5.5m	NA	OSKM[4d]	NA	NA	figure s3b	38322248	OSKM
Paine et al	NA	skin	fibroblast	tail tip fibroblast	reprogramming	intermediate filament cytoskeleton organization	Cytoskeletal	up	in vitro	mouse	WT	bulk RNA-seq	GSE231853	untreated	treated	5.5m	5.5m	NA	OSKM+VC[2d]	NA	NA	figure s3b	38322248	OSKM
Paine et al	NA	skin	fibroblast	tail tip fibroblast	reprogramming	intermediate filament cytoskeleton organization	Cytoskeletal	up	in vitro	mouse	WT	bulk RNA-seq	GSE231853	untreated	treated	5.5m	5.5m	NA	OSKM+VC[4d]	NA	NA	figure s3b	38322248	OSKM
Paine et al	NA	skin	fibroblast	tail tip fibroblast	reprogramming	keratinization	Development/Differentiation	up	in vitro	mouse	progeric	bulk RNA-seq	GSE231853	untreated	treated	2m	2m	NA	OSKM[2d]	NA	NA	figure s3b	38322248	OSKM
Paine et al	NA	skin	fibroblast	tail tip fibroblast	reprogramming	keratinization	Development/Differentiation	up	in vitro	mouse	progeric	bulk RNA-seq	GSE231853	untreated	treated	2m	2m	NA	OSKM[4d]	NA	NA	figure s3b	38322248	OSKM
Paine et al	NA	skin	fibroblast	tail tip fibroblast	reprogramming	keratinization	Development/Differentiation	up	in vitro	mouse	progeric	bulk RNA-seq	GSE231853	untreated	treated	2m	2m	NA	OSKM+VC[2d]	NA	NA	figure s3b	38322248	OSKM
Paine et al	NA	skin	fibroblast	tail tip fibroblast	reprogramming	keratinization	Development/Differentiation	up	in vitro	mouse	progeric	bulk RNA-seq	GSE231853	untreated	treated	2m	2m	NA	OSKM+VC[4d]	NA	NA	figure s3b	38322248	OSKM
Paine et al	NA	skin	fibroblast	tail tip fibroblast	reprogramming	keratinization	Development/Differentiation	up	in vitro	mouse	WT	bulk RNA-seq	GSE231853	untreated	treated	5.5m	5.5m	NA	OSKM[2d]	NA	NA	figure s3b	38322248	OSKM
Paine et al	NA	skin	fibroblast	tail tip fibroblast	reprogramming	keratinization	Development/Differentiation	up	in vitro	mouse	WT	bulk RNA-seq	GSE231853	untreated	treated	5.5m	5.5m	NA	OSKM[4d]	NA	NA	figure s3b	38322248	OSKM
Paine et al	NA	skin	fibroblast	tail tip fibroblast	reprogramming	keratinization	Development/Differentiation	up	in vitro	mouse	WT	bulk RNA-seq	GSE231853	untreated	treated	5.5m	5.5m	NA	OSKM+VC[2d]	NA	NA	figure s3b	38322248	OSKM
Paine et al	NA	skin	fibroblast	tail tip fibroblast	reprogramming	keratinization	Development/Differentiation	up	in vitro	mouse	WT	bulk RNA-seq	GSE231853	untreated	treated	5.5m	5.5m	NA	OSKM+VC[4d]	NA	NA	figure s3b	38322248	OSKM
Roux et al	NA	adipose	adipogenic	NA	reprogramming	fatty acid metabolism	Energetics	up	in vitro	mouse	WT	scRNA-seq	GSE176206	untreated	treated	20-24m	20-24m	NA	OSKM[3d]+rest[3d]	3d	NA	figure 1g	35690067	OSKM
Roux et al	NA	adipose	adipogenic	NA	aging	fatty acid metabolism	Energetics	down	in vitro	mouse	WT	scRNA-seq	GSE176206	untreated	untreated	2-4m	20-24m	NA	NA	3d	NA	figure 1g	35690067	NA
Roux et al	NA	adipose	adipogenic	NA	aging	inflammation	Inflammation	up	in vitro	mouse	WT	scRNA-seq	GSE176206	untreated	untreated	2-4m	20-24m	NA	NA	3d	NA	figure 1g	35690067	NA
Roux et al	NA	adipose	adipogenic	NA	reprogramming	inflammation	Inflammation	down	in vitro	mouse	WT	scRNA-seq	GSE176206	untreated	treated	20-24m	20-24m	NA	OSKM[3d]+rest[3d]	3d	NA	figure 1g	35690067	OSKM
Roux et al	NA	adipose	adipogenic	NA	aging	oxidation phosphorylation	Energetics	up	in vitro	mouse	WT	scRNA-seq	GSE176206	untreated	untreated	2-4m	20-24m	NA	NA	3d	NA	figure s2d	35690067	NA
Roux et al	NA	adipose	adipogenic	NA	reprogramming	oxidation phosphorylation	Energetics	up	in vitro	mouse	WT	scRNA-seq	GSE176206	untreated	treated	20-24m	20-24m	NA	OSKM[3d]+rest[3d]	3d	NA	figure s2d	35690067	OSKM
Roux et al	NA	adipose	adipogenic	NA	aging	mtor signaling	mTOR	up	in vitro	mouse	WT	scRNA-seq	GSE176206	untreated	untreated	2-4m	20-24m	NA	NA	3d	NA	figure s2d	35690067	NA
Roux et al	NA	adipose	adipogenic	NA	reprogramming	mtor signaling	mTOR	up	in vitro	mouse	WT	scRNA-seq	GSE176206	untreated	treated	20-24m	20-24m	NA	OSKM[3d]+rest[3d]	3d	NA	figure s2d	35690067	OSKM
Roux et al	NA	adipose	adipogenic	NA	aging	EMT	EMT	down	in vitro	mouse	WT	scRNA-seq	GSE176206	untreated	untreated	2-4m	20-24m	NA	NA	3d	NA	figure s2d	35690067	NA
Roux et al	NA	adipose	adipogenic	NA	reprogramming	EMT	EMT	down	in vitro	mouse	WT	scRNA-seq	GSE176206	untreated	treated	20-24m	20-24m	NA	OSKM[3d]+rest[3d]	3d	NA	figure s2d	35690067	OSKM
Roux et al	NA	muscle	stem cell	MSC	reprogramming	aging score	Aging	down	in vitro	mouse	WT	scRNA-seq	GSE176206	untreated	treated	20-24m	20-24m	NA	OSKM[3d]+rest[3d]	3d	NA	figure s5d	35690067	OSKM
Roux et al	NA	muscle	stem cell	MSC	aging	aging score	Aging	up	in vitro	mouse	WT	scRNA-seq	GSE176206	untreated	untreated	2-4m	20-24m	NA	NA	3d	NA	figure s5d	35690067	NA
Roux et al	NA	muscle	stem cell	MSC	reprogramming	fibrosis score		down	in vitro	mouse	WT	scRNA-seq	GSE176206	untreated	treated	20-24m	20-24m	NA	OSKM[3d]+rest[3d]	3d	NA	figure s5d	35690067	OSKM
Roux et al	NA	muscle	stem cell	MSC	aging	fibrosis score		up	in vitro	mouse	WT	scRNA-seq	GSE176206	untreated	untreated	2-4m	20-24m	NA	NA	3d	NA	figure s5d	35690067	NA
Roux et al	NA	muscle	stem cell	MSC	reprogramming	EMT	EMT	down	in vitro	mouse	WT	scRNA-seq	GSE176206	untreated	treated	20-24m	20-24m	NA	OSKM[3d]+rest[3d]	3d	NA	figure s5g	35690067	OSKM
Roux et al	NA	muscle	stem cell	MSC	aging	p53 signaling	p53	down	in vitro	mouse	WT	scRNA-seq	GSE176206	untreated	untreated	2-4m	20-24m	NA	NA	3d	NA	figure 3h	35690067	NA
Roux et al	NA	muscle	stem cell	MSC	reprogramming	p53 signaling	p53	up	in vitro	mouse	WT	scRNA-seq	GSE176206	untreated	treated	20-24m	20-24m	NA	OSKM[3d]+rest[3d]	3d	NA	figure 3h	35690067	OSKM
Roux et al	NA	muscle	stem cell	MSC	aging	G2M checkpoint	Proliferation	up	in vitro	mouse	WT	scRNA-seq	GSE176206	untreated	untreated	2-4m	20-24m	NA	NA	3d	NA	figure 3h	35690067	NA
Roux et al	NA	muscle	stem cell	MSC	reprogramming	G2M checkpoint	Proliferation	down	in vitro	mouse	WT	scRNA-seq	GSE176206	untreated	treated	20-24m	20-24m	NA	OSKM[3d]+rest[3d]	3d	NA	figure 3h	35690067	OSKM
Xu et al	SVZ	brain	aNSC–NPC		reprogramming	RNA processing	Transcription Control	up	in vivo	mouse	WT	scRNA-seq	GSE245385	untreated	treated	3-4m	24-26m	NA	OSKM[7d]	NA	NA	figure 5e	38553564	OSKM
Xu et al	whole body	brain	aNSC–NPC	NA	aging	RNA processing	Transcription Control	up	in vivo	mouse	WT	scRNA-seq	GSE245385	untreated	untreated	3m	18+m	NA	NA	NA	NA	figure 2d	38553564	NA
Xu et al	whole body	brain	aNSC–NPC		reprogramming	RNA processing	Transcription Control	down	in vivo	mouse	WT	scRNA-seq	GSE245385	untreated	treated	18+m	18+m	NA	[OSKM[2d]+rest[5d]]*[3 cycles]	NA	NA	figure 2d	38553564	OSKM
Xu et al	whole body	brain	aNSC–NPC		reprogramming	Protein processing		down	in vivo	mouse	WT	scRNA-seq	GSE245385	untreated	treated	18+m	18+m	NA	[OSKM[2d]+rest[5d]]*[3 cycles]	NA	NA	figure 2g	38553564	OSKM
Xu et al	whole body	brain	aNSC–NPC	NA	aging	cell adhesion	Cell Adhesion	up	in vivo	mouse	WT	scRNA-seq	GSE245385	untreated	untreated	3m	18+m	NA	NA	NA	NA	figure 2e	38553564	NA
Xu et al	whole body	brain	aNSC–NPC		reprogramming	cell adhesion	Cell Adhesion	down	in vivo	mouse	WT	scRNA-seq	GSE245385	untreated	treated	18+m	18+m	NA	[OSKM[2d]+rest[5d]]*[3 cycles]	NA	NA	figure 2e	38553564	OSKM
Xu et al	whole body	brain	neuroblast		reprogramming	cell proportion	Cell Number	up	in vivo	mouse	WT	scRNA-seq	GSE245385	untreated	treated	18+m	18+m	NA	[OSKM[2d]+rest[5d]]*[3 cycles]	NA	NA	figure 3	38553564	OSKM
Xu et al	whole body	brain	neuroblast		aging	cell proportion	Cell Number	down	in vivo	mouse	WT	scRNA-seq	GSE245385	untreated	untreated	3m	18+m	NA	NA	NA	NA	figure 3	38553564	NA
Xu et al	whole body	brain	neuroblast	NA	aging	inflammatory response	Inflammation	down	in vivo	mouse	WT	scRNA-seq	GSE245385	untreated	untreated	3m	18+m	NA	NA	NA	NA	figure 2f	38553564	NA
Xu et al	whole body	brain	neuroblast		reprogramming	inflammatory response	Inflammation	up	in vivo	mouse	WT	scRNA-seq	GSE245385	untreated	treated	18+m	18+m	NA	[OSKM[2d]+rest[5d]]*[3 cycles]	NA	NA	figure 2f	38553564	OSKM
Xu et al	whole body	brain	neuroblast	NA	aging	RNA processing	Transcription Control	both	in vivo	mouse	WT	scRNA-seq	GSE245385	untreated	untreated	3m	18+m	NA	NA	NA	NA	figure 2d	38553564	NA
Xu et al	whole body	brain	neuroblast		reprogramming	RNA processing	Transcription Control	both	in vivo	mouse	WT	scRNA-seq	GSE245385	untreated	treated	18+m	18+m	NA	[OSKM[2d]+rest[5d]]*[3 cycles]	NA	NA	figure 2d	38553564	OSKM
Xu et al	whole body	brain	neuroblast		reprogramming	catabolism		down	in vivo	mouse	WT	scRNA-seq	GSE245385	untreated	treated	18+m	18+m	NA	[OSKM[2d]+rest[5d]]*[3 cycles]	NA	NA	figure 2h	38553564	OSKM
Xu et al	whole body	brain	neuroblast		reprogramming	single-cell transcriptomic clock	Aging	both	in vivo	mouse	WT	scRNA-seq	GSE245385	untreated	treated	18+m	18+m	NA	[OSKM[2d]+rest[5d]]*[3 cycles]	NA	NA	figure s3c	38553564	OSKM
Xu et al	SVZ	brain	aNSC–NPC		reprogramming	cell proportion	Cell Number	up	in vivo	mouse	WT	scRNA-seq	GSE245385	untreated	treated	3-4m	24-26m	NA	OSKM[7d]	NA	NA	figure 4i	38553564	OSKM
Xu et al	SVZ	brain	aNSC–NPC		aging	cell proportion	Cell Number	down	in vivo	mouse	WT	scRNA-seq	GSE245385	untreated	untreated	3-4m	24-26m	NA	NA	NA	NA	figure 4i	38553564	NA
Xu et al	SVZ	brain	aNSC–NPC		reprogramming	cell adhesion	Cell Adhesion	down	in vivo	mouse	WT	scRNA-seq	GSE245385	untreated	treated	3-4m	24-26m	NA	OSKM[7d]	NA	NA	figure 5f	38553564	OSKM
Xu et al	SVZ	brain	aNSC–NPC		aging	cell adhesion	Cell Adhesion	up	in vivo	mouse	WT	scRNA-seq	GSE245385	untreated	untreated	3-4m	24-26m	NA	NA	NA	NA	figure 5f	38553564	NA
Xu et al	SVZ	brain	aNSC–NPC		reprogramming	cation channel activity		up	in vivo	mouse	WT	scRNA-seq	GSE245385	untreated	treated	3-4m	24-26m	NA	OSKM[7d]	NA	NA	figure 5g	38553564	OSKM
Xu et al	SVZ	brain	aNSC–NPC		reprogramming	translation termination		up	in vivo	mouse	WT	scRNA-seq	GSE245385	untreated	treated	3-4m	24-26m	NA	OSKM[7d]	NA	NA	figure 5g	38553564	OSKM
Xu et al	SVZ	brain	aNSC–NPC		aging	RNA processing	Transcription Control	down	in vivo	mouse	WT	scRNA-seq	GSE245385	untreated	untreated	3-4m	24-26m	NA	NA	NA	NA	figure 5e	38553564	NA
Xu et al	SVZ	brain	neuroblast		reprogramming	cell proportion	Cell Number	up	in vivo	mouse	WT	scRNA-seq	GSE245385	untreated	treated	3-4m	24-26m	NA	OSKM[7d]	NA	NA	figure 4i	38553564	OSKM
Xu et al	SVZ	brain	neuroblast		aging	cell proportion	Cell Number	down	in vivo	mouse	WT	scRNA-seq	GSE245385	untreated	untreated	3-4m	24-26m	NA	NA	NA	NA	figure 4i	38553564	NA
Xu et al	SVZ	brain	neuroblast		aging	RNA processing	Transcription Control	down	in vivo	mouse	WT	scRNA-seq	GSE245385	untreated	untreated	3-4m	24-26m	NA	NA	NA	NA	figure 5e	38553564	NA
Xu et al	SVZ	brain	aNSC–NPC		reprogramming	RNA processing	Transcription Control	up	in vivo	mouse	WT	scRNA-seq	GSE245385	untreated	treated	3-4m	24-26m	NA	OSKM[7d]	NA	NA	figure 5e	38553564	OSKM
Xu et al	SVZ	brain	neuroblast		reprogramming	RNA processing	Transcription Control	down	in vivo	mouse	WT	scRNA-seq	GSE245385	untreated	treated	3-4m	24-26m	NA	OSKM[7d]	NA	NA	figure 5e	38553564	OSKM
Xu et al	SVZ	brain	neuroblast		reprogramming	chromatin binding	Transcription Control	down	in vivo	mouse	WT	scRNA-seq	GSE245385	untreated	treated	3-4m	24-26m	NA	OSKM[7d]	NA	NA	figure 5i	38553564	OSKM
Xu et al	SVZ	brain	neuroblast		aging	chromatin binding	Transcription Control	up	in vivo	mouse	WT	scRNA-seq	GSE245385	untreated	untreated	3-4m	24-26m	NA	NA	NA	NA	figure 5i	38553564	NA
Xu et al	SVZ	brain	neuroblast		reprogramming	cell adhesion	Cell Adhesion	down	in vivo	mouse	WT	scRNA-seq	GSE245385	untreated	treated	3-4m	24-26m	NA	OSKM[7d]	NA	NA	figure 5f	38553564	OSKM
Xu et al	SVZ	brain	neuroblast		reprogramming	inflammatory response	Inflammation	up	in vivo	mouse	WT	scRNA-seq	GSE245385	untreated	treated	3-4m	24-26m	NA	OSKM[7d]	NA	NA	figure 5m	38553564	OSKM
Xu et al	SVZ	brain	neuroblast		aging	neuron migration		up	in vivo	mouse	WT	scRNA-seq	GSE245385	untreated	untreated	3-4m	24-26m	NA	NA	NA	NA	figure 5k	38553564	NA
Xu et al	SVZ	brain	neuroblast		reprogramming	neuron migration		down	in vivo	mouse	WT	scRNA-seq	GSE245385	untreated	treated	3-4m	24-26m	NA	OSKM[7d]	NA	NA	figure 5k	38553564	OSKM
Xu et al	SVZ	brain	neuroblast		aging	cell adhesion	Cell Adhesion	both	in vivo	mouse	WT	scRNA-seq	GSE245385	untreated	untreated	3-4m	24-26m	NA	NA	NA	NA	figure 5f	38553564	NA
Xu et al	SVZ	brain	aNSC–NPC		reprogramming	single-cell transcriptomic clock	Aging	both	in vivo	mouse	WT	scRNA-seq	GSE245385	treated	treated	24-26m	24-26m	NA	OSKM[7d]	NA	NA	figure s6g	38553564	OSKM
Xu et al	SVZ	brain	neuroblast		reprogramming	single-cell transcriptomic clock	Aging	no change	in vivo	mouse	WT	scRNA-seq	GSE245385	treated	treated	24-26m	24-26m	NA	OSKM[7d]	NA	NA	figure s6g	38553564	OSKM
Xu et al	NA	brain	neuronal stem	stem cell	aging	cell adhesion	Cell Adhesion	up	in vitro	mouse	WT	bulk RNA-seq	GSE245385	untreated	untreated	3-4m	24-26m	NA	NA	NA	NA	figure 7e	38553564	NA
Xu et al	NA	brain	neuronal stem	stem cell	aging	RNA processing	Transcription Control	up	in vitro	mouse	WT	bulk RNA-seq	GSE245385	untreated	untreated	3-4m	24-26m	NA	NA	NA	NA	figure 7e	38553564	NA
Xu et al	NA	brain	neuronal stem	stem cell	reprogramming	RNA processing	Transcription Control	down	in vitro	mouse	WT	bulk RNA-seq	GSE245385	untreated	treated	24-26m	24-26m	NA	OSKM[18h]	NA	NA	figure 7e	38553564	OSKM
Xu et al	NA	brain	neuronal stem	stem cell	reprogramming	RNA processing	Transcription Control	down	in vitro	mouse	WT	bulk RNA-seq	GSE245385	untreated	treated	24-26m	24-26m	NA	OSKM[48h]	NA	NA	figure 7e	38553564	OSKM
Xu et al	NA	brain	neuronal stem	stem cell	reprogramming	RNA processing	Transcription Control	up	in vitro	mouse	WT	bulk RNA-seq	GSE245385	untreated	treated	24-26m	24-26m	NA	OSKM[6h]	NA	NA	figure 7e	38553564	OSKM
Xu et al	NA	brain	neuronal stem	stem cell	aging	chromatin organization	Chromatin Organization	up	in vitro	mouse	WT	bulk RNA-seq	GSE245385	untreated	untreated	3-4m	24-26m	NA	NA	NA	NA	figure 7e	38553564	NA
Xu et al	NA	brain	neuronal stem	stem cell	reprogramming	chromatin organization	Chromatin Organization	down	in vitro	mouse	WT	bulk RNA-seq	GSE245385	untreated	treated	24-26m	24-26m	NA	OSKM[18h]	NA	NA	figure 7e	38553564	OSKM
Xu et al	NA	brain	neuronal stem	stem cell	reprogramming	chromatin organization	Chromatin Organization	down	in vitro	mouse	WT	bulk RNA-seq	GSE245385	untreated	treated	24-26m	24-26m	NA	OSKM[48h]	NA	NA	figure 7e	38553564	OSKM
Xu et al	NA	brain	neuronal stem	stem cell	reprogramming	chromatin organization	Chromatin Organization	up	in vitro	mouse	WT	bulk RNA-seq	GSE245385	untreated	treated	24-26m	24-26m	NA	OSKM[6h]	NA	NA	figure 7e	38553564	OSKM
Xu et al	SVZ	brain	neuroblast		reprogramming	hydrogen peroxide catabolism	Metabolism	up	in vivo	mouse	WT	scRNA-seq	GSE245385	untreated	treated	3-4m	24-26m	NA	OSKM[7d]	NA	NA	figure 5h	38553564	OSKM
Xu et al	SVZ	brain	neuroblast		reprogramming	RNA processing	Transcription Control	down	in vivo	mouse	WT	scRNA-seq	GSE245385	untreated	treated	3-4m	24-26m	NA	OSKM[7d]	NA	NA	figure 5e	38553564	OSKM
Xu et al	SVZ	brain	aNSC–NPC		aging	transcription factor binding	Transcription Control	up	in vivo	mouse	WT	scRNA-seq	GSE245385	untreated	untreated	3-4m	24-26m	NA	NA	NA	NA	figure 5d	38553564	NA
Xu et al	SVZ	brain	aNSC–NPC		aging	double-stranded DNA-binding	Transcription Control	down	in vivo	mouse	WT	scRNA-seq	GSE245385	untreated	untreated	3-4m	24-26m	NA	NA	NA	NA	figure 5d	38553564	NA
Xu et al	SVZ	brain	aNSC–NPC		aging	DNA-binding transcription factor activity	Transcription Control	down	in vivo	mouse	WT	scRNA-seq	GSE245385	untreated	untreated	3-4m	24-26m	NA	NA	NA	NA	figure 5d	38553564	NA
Xu et al	SVZ	brain	aNSC–NPC		aging	chromatin	Chromatin Organization	down	in vivo	mouse	WT	scRNA-seq	GSE245385	untreated	untreated	3-4m	24-26m	NA	NA	NA	NA	figure 5d	38553564	NA
Xu et al	SVZ	brain	aNSC–NPC		reprogramming	transcription factor binding	Transcription Control	down	in vivo	mouse	WT	scRNA-seq	GSE245385	untreated	treated	24-26m	24-26m	NA	OSKM[7d]	NA	NA	figure 5d	38553564	OSKM
Xu et al	SVZ	brain	aNSC–NPC		reprogramming	double-stranded DNA-binding	Transcription Control	down	in vivo	mouse	WT	scRNA-seq	GSE245385	untreated	treated	24-26m	24-26m	NA	OSKM[7d]	NA	NA	figure 5d	38553564	OSKM
Xu et al	SVZ	brain	aNSC–NPC		reprogramming	DNA-binding transcription factor activity	Transcription Control	down	in vivo	mouse	WT	scRNA-seq	GSE245385	untreated	treated	24-26m	24-26m	NA	OSKM[7d]	NA	NA	figure 5d	38553564	OSKM
Xu et al	SVZ	brain	aNSC–NPC		reprogramming	chromatin	Chromatin Organization	down	in vivo	mouse	WT	scRNA-seq	GSE245385	untreated	treated	24-26m	24-26m	NA	OSKM[7d]	NA	NA	figure 5d	38553564	OSKM
Xu et al	SVZ	brain	neuroblast		aging	transcription factor binding	Transcription Control	down	in vivo	mouse	WT	scRNA-seq	GSE245385	untreated	untreated	3-4m	24-26m	NA	NA	NA	NA	figure 5d	38553564	NA
Xu et al	SVZ	brain	neuroblast		aging	double-stranded DNA-binding	Transcription Control	up	in vivo	mouse	WT	scRNA-seq	GSE245385	untreated	untreated	3-4m	24-26m	NA	NA	NA	NA	figure 5d	38553564	NA
Xu et al	SVZ	brain	neuroblast		aging	DNA-binding transcription factor activity	Transcription Control	up	in vivo	mouse	WT	scRNA-seq	GSE245385	untreated	untreated	3-4m	24-26m	NA	NA	NA	NA	figure 5d	38553564	NA
Xu et al	SVZ	brain	neuroblast		aging	chromatin	Chromatin Organization	up	in vivo	mouse	WT	scRNA-seq	GSE245385	untreated	untreated	3-4m	24-26m	NA	NA	NA	NA	figure 5d	38553564	NA
Xu et al	SVZ	brain	neuroblast		reprogramming	transcription factor binding	Transcription Control	down	in vivo	mouse	WT	scRNA-seq	GSE245385	untreated	treated	24-26m	24-26m	NA	OSKM[7d]	NA	NA	figure 5d	38553564	OSKM
Xu et al	SVZ	brain	neuroblast		reprogramming	double-stranded DNA-binding	Transcription Control	down	in vivo	mouse	WT	scRNA-seq	GSE245385	untreated	treated	24-26m	24-26m	NA	OSKM[7d]	NA	NA	figure 5d	38553564	OSKM
Xu et al	SVZ	brain	neuroblast		reprogramming	DNA-binding transcription factor activity	Transcription Control	down	in vivo	mouse	WT	scRNA-seq	GSE245385	untreated	treated	24-26m	24-26m	NA	OSKM[7d]	NA	NA	figure 5d	38553564	OSKM
Xu et al	SVZ	brain	neuroblast		reprogramming	chromatin	Chromatin Organization	down	in vivo	mouse	WT	scRNA-seq	GSE245385	untreated	treated	24-26m	24-26m	NA	OSKM[7d]	NA	NA	figure 5d	38553564	OSKM
Yang et al	NA	fibroblast	RS fibroblast	NA	reprogramming	cell cycle	Proliferation	up	in vitro	human	WT	bulk RNA-seq	NA	untreated	treated	senescent	senescent	NA	OSKM[4d]	0d	NA	figure 2f	37437248	OSKM
Yang et al	NA	fibroblast	RS fibroblast	NA	reprogramming	localization		down	in vitro	human	WT	bulk RNA-seq	NA	untreated	treated	senescent	senescent	NA	OSKM[4d]	0d	NA	figure 2e	37437248	OSKM
Yang et al	NA	fibroblast	RS fibroblast	NA	reprogramming	development	Development/Differentiation	down	in vitro	human	WT	bulk RNA-seq	NA	untreated	treated	senescent	senescent	NA	OSKM[4d]	0d	NA	figure 2e	37437248	OSKM
Yang et al	NA	fibroblast	RS fibroblast	NA	reprogramming	transport		down	in vitro	human	WT	bulk RNA-seq	NA	untreated	treated	senescent	senescent	NA	OSKM[4d]	0d	NA	figure 2e	37437248	chemical
Yang et al	NA	fibroblast	RS fibroblast	NA	reprogramming	interferon signaling/response	Inflammation	down	in vitro	human	WT	bulk RNA-seq	NA	untreated	treated	senescent	senescent	NA	chemical[6 cocktails]	0d	6 cocktails: VPA+CHIR9902+RepSox+Tranylcypromine+FSK, VPA+CHIR9902+RepSox+Tranylcypromine+FSK+sodiumbutyrate, VPA+CHIR9902+RepSox+Tranylcypromine+FSK+bFGF, CHIR9902+RepSox+TTNPB+Y27632+SAG+ABT869, CHIR9902+RepSox+TTNPB+Y27632+SAG+ABT869+sodiumbutyrate, CHIR9902+RepSox+TTNPB+Y27632+SAG+α-KG[4d]	figure 4e	37437248	chemical
Yang et al	NA	fibroblast	RS fibroblast	NA	reprogramming	hypoxia	Stress Response	down	in vitro	human	WT	bulk RNA-seq	NA	untreated	treated	senescent	senescent	NA	chemical[6 cocktails]	0d	6 cocktails: VPA+CHIR9902+RepSox+Tranylcypromine+FSK, VPA+CHIR9902+RepSox+Tranylcypromine+FSK+sodiumbutyrate, VPA+CHIR9902+RepSox+Tranylcypromine+FSK+bFGF, CHIR9902+RepSox+TTNPB+Y27632+SAG+ABT869, CHIR9902+RepSox+TTNPB+Y27632+SAG+ABT869+sodiumbutyrate, CHIR9902+RepSox+TTNPB+Y27632+SAG+α-KG[4d]	figure 4e	37437248	chemical
Yang et al	NA	fibroblast	RS fibroblast	NA	reprogramming	EMT	EMT	down	in vitro	human	WT	bulk RNA-seq	NA	untreated	treated	senescent	senescent	NA	chemical[6 cocktails]	0d	6 cocktails: VPA+CHIR9902+RepSox+Tranylcypromine+FSK, VPA+CHIR9902+RepSox+Tranylcypromine+FSK+sodiumbutyrate, VPA+CHIR9902+RepSox+Tranylcypromine+FSK+bFGF, CHIR9902+RepSox+TTNPB+Y27632+SAG+ABT869, CHIR9902+RepSox+TTNPB+Y27632+SAG+ABT869+sodiumbutyrate, CHIR9902+RepSox+TTNPB+Y27632+SAG+α-KG[4d]	figure 4e	37437248	chemical
Yang et al	NA	fibroblast	RS fibroblast	NA	reprogramming	ECM organization	ECM	down	in vitro	human	WT	bulk RNA-seq	NA	untreated	treated	senescent	senescent	NA	chemical[6 cocktails]	0d	6 cocktails: VPA+CHIR9902+RepSox+Tranylcypromine+FSK, VPA+CHIR9902+RepSox+Tranylcypromine+FSK+sodiumbutyrate, VPA+CHIR9902+RepSox+Tranylcypromine+FSK+bFGF, CHIR9902+RepSox+TTNPB+Y27632+SAG+ABT869, CHIR9902+RepSox+TTNPB+Y27632+SAG+ABT869+sodiumbutyrate, CHIR9902+RepSox+TTNPB+Y27632+SAG+α-KG[4d]	figure 4e	37437248	chemical
Yang et al	NA	fibroblast	RS fibroblast	NA	reprogramming	TNFa signaling via NF-kB	Inflammation	down	in vitro	human	WT	bulk RNA-seq	NA	untreated	treated	senescent	senescent	NA	chemical[6 cocktails]	0d	6 cocktails: VPA+CHIR9902+RepSox+Tranylcypromine+FSK, VPA+CHIR9902+RepSox+Tranylcypromine+FSK+sodiumbutyrate, VPA+CHIR9902+RepSox+Tranylcypromine+FSK+bFGF, CHIR9902+RepSox+TTNPB+Y27632+SAG+ABT869, CHIR9902+RepSox+TTNPB+Y27632+SAG+ABT869+sodiumbutyrate, CHIR9902+RepSox+TTNPB+Y27632+SAG+α-KG[4d]	figure 4e	37437248	chemical
Yang et al	NA	fibroblast	RS fibroblast	NA	reprogramming	PPAR signaling		up	in vitro	human	WT	bulk RNA-seq	NA	untreated	treated	senescent	senescent	NA	chemical[6 cocktails]	0d	6 cocktails: VPA+CHIR9902+RepSox+Tranylcypromine+FSK, VPA+CHIR9902+RepSox+Tranylcypromine+FSK+sodiumbutyrate, VPA+CHIR9902+RepSox+Tranylcypromine+FSK+bFGF, CHIR9902+RepSox+TTNPB+Y27632+SAG+ABT869, CHIR9902+RepSox+TTNPB+Y27632+SAG+ABT869+sodiumbutyrate, CHIR9902+RepSox+TTNPB+Y27632+SAG+α-KG[4d]	figure 4e	37437248	chemical
Yang et al	NA	fibroblast	RS fibroblast	NA	reprogramming	activation of gene expression by SREPF and SREPB		up	in vitro	human	WT	bulk RNA-seq	NA	untreated	treated	senescent	senescent	NA	chemical[6 cocktails]	0d	6 cocktails: VPA+CHIR9902+RepSox+Tranylcypromine+FSK, VPA+CHIR9902+RepSox+Tranylcypromine+FSK+sodiumbutyrate, VPA+CHIR9902+RepSox+Tranylcypromine+FSK+bFGF, CHIR9902+RepSox+TTNPB+Y27632+SAG+ABT869, CHIR9902+RepSox+TTNPB+Y27632+SAG+ABT869+sodiumbutyrate, CHIR9902+RepSox+TTNPB+Y27632+SAG+α-KG[4d]	figure 4e	37437248	chemical
Yang et al	NA	fibroblast	RS fibroblast	NA	reprogramming	oxidative phosphorylation	Energetics	up	in vitro	human	WT	bulk RNA-seq	NA	untreated	treated	senescent	senescent	NA	chemical[6 cocktails]	0d	6 cocktails: VPA+CHIR9902+RepSox+Tranylcypromine+FSK, VPA+CHIR9902+RepSox+Tranylcypromine+FSK+sodiumbutyrate, VPA+CHIR9902+RepSox+Tranylcypromine+FSK+bFGF, CHIR9902+RepSox+TTNPB+Y27632+SAG+ABT869, CHIR9902+RepSox+TTNPB+Y27632+SAG+ABT869+sodiumbutyrate, CHIR9902+RepSox+TTNPB+Y27632+SAG+α-KG[4d]	figure 4e	37437248	chemical
Yang et al	NA	fibroblast	RS fibroblast	NA	reprogramming	respiratory electron transport	Energetics	up	in vitro	human	WT	bulk RNA-seq	NA	untreated	treated	senescent	senescent	NA	chemical[6 cocktails]	0d	6 cocktails: VPA+CHIR9902+RepSox+Tranylcypromine+FSK, VPA+CHIR9902+RepSox+Tranylcypromine+FSK+sodiumbutyrate, VPA+CHIR9902+RepSox+Tranylcypromine+FSK+bFGF, CHIR9902+RepSox+TTNPB+Y27632+SAG+ABT869, CHIR9902+RepSox+TTNPB+Y27632+SAG+ABT869+sodiumbutyrate, CHIR9902+RepSox+TTNPB+Y27632+SAG+α-KG[4d]	figure 4e	37437248	chemical
Yang et al	NA	fibroblast	RS fibroblast	NA	reprogramming	myc targets	Proliferation	up	in vitro	human	WT	bulk RNA-seq	NA	untreated	treated	senescent	senescent	NA	chemical[6 cocktails]	0d	6 cocktails: VPA+CHIR9902+RepSox+Tranylcypromine+FSK, VPA+CHIR9902+RepSox+Tranylcypromine+FSK+sodiumbutyrate, VPA+CHIR9902+RepSox+Tranylcypromine+FSK+bFGF, CHIR9902+RepSox+TTNPB+Y27632+SAG+ABT869, CHIR9902+RepSox+TTNPB+Y27632+SAG+ABT869+sodiumbutyrate, CHIR9902+RepSox+TTNPB+Y27632+SAG+α-KG[4d]	figure 4e	37437248	chemical
